# Supplementary material for: Systematic review of universal school-based resilience interventions targeting adolescent tobacco, alcohol or illicit drug use: review protocol
Source: PubMed Central journal article supplement — BMJ Open. 2014 May 24;4(5):e004718. doi: 10.1136/bmjopen-2013-004718 (PMC4039828; doi:10.1136/bmjopen-2013-004718), 2014-05-24
Supplement: bmjopen-2013-004718.draft_revisions.pdf [file bmjopen-2013-004718.draft_revisions.pdf]

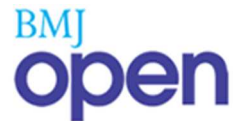

**Systematic review of school-based resilience interventions targeting adolescent tobacco, alcohol or illicit drug use: review protocol**

|                                 |                                                                                                                                                                                                                                                                                                                                                                                                                                                                                                                                                                                                                                                                                                                                                                                                                                          |
|---------------------------------|------------------------------------------------------------------------------------------------------------------------------------------------------------------------------------------------------------------------------------------------------------------------------------------------------------------------------------------------------------------------------------------------------------------------------------------------------------------------------------------------------------------------------------------------------------------------------------------------------------------------------------------------------------------------------------------------------------------------------------------------------------------------------------------------------------------------------------------|
| Journal:                        | <i>BMJ Open</i>                                                                                                                                                                                                                                                                                                                                                                                                                                                                                                                                                                                                                                                                                                                                                                                                                          |
| Manuscript ID:                  | bmjopen-2013-004718                                                                                                                                                                                                                                                                                                                                                                                                                                                                                                                                                                                                                                                                                                                                                                                                                      |
| Article Type:                   | Protocol                                                                                                                                                                                                                                                                                                                                                                                                                                                                                                                                                                                                                                                                                                                                                                                                                                 |
| Date Submitted by the Author:   | 19-Dec-2013                                                                                                                                                                                                                                                                                                                                                                                                                                                                                                                                                                                                                                                                                                                                                                                                                              |
| Complete List of Authors:       | Hodder, Rebecca; Hunter New England Local Health District, Hunter New England Population Health; The University of Newcastle, Freund, Megan; Hunter New England Local Health District, Hunter New England Population Health; Hunter Medical Research Institute, Wolfenden, Luke; Hunter New England Local Health District, Hunter New England Population Health; Hunter Medical Research Institute, Bowman, Jenny; The University of Newcastle, Gillham, Karen; Hunter New England Local Health District, Hunter New England Population Health; Hunter Medical Research Institute, Dray, Julia; Hunter New England Local Health District, Hunter New England Population Health; The University of Newcastle, Wiggers, John; Hunter New England Local Health District, Hunter New England Population Health; The University of Newcastle, |
| <b>Primary Subject Heading</b>: | Mental health                                                                                                                                                                                                                                                                                                                                                                                                                                                                                                                                                                                                                                                                                                                                                                                                                            |
| Secondary Subject Heading:      | Smoking and tobacco, Public health, Addiction                                                                                                                                                                                                                                                                                                                                                                                                                                                                                                                                                                                                                                                                                                                                                                                            |
| Keywords:                       | MENTAL HEALTH, Substance misuse < PSYCHIATRY, RESILIENCE, ADOLESCENCE                                                                                                                                                                                                                                                                                                                                                                                                                                                                                                                                                                                                                                                                                                                                                                    |
|                                 |                                                                                                                                                                                                                                                                                                                                                                                                                                                                                                                                                                                                                                                                                                                                                                                                                                          |

SCHOLARONE™  
Manuscripts

**TITLE:** Systematic review of school-based resilience interventions targeting adolescent tobacco, alcohol or illicit drug use: review protocol

**CORRESPONDING AUTHOR:**

Rebecca Kate Hodder

Departments/Institutions: Hunter New England Population Health, Hunter New England Local Health District; The University of Newcastle; Hunter Medical Research Institute

Address: Hunter New England Population Health, Hunter New England Local Health District, Locked Bag 10, Wallsend, NSW, 2287, Australia.

Email: [Rebecca.hodder@hnehealth.nsw.gov.au](mailto:Rebecca.hodder@hnehealth.nsw.gov.au);

Telephone: +61 2 4924 6499;

Fax: +61 2 4924 6215

**CO-AUTHORS:**

**Megan Freund**

*Departments/Institutions:* The University of Newcastle, Hunter New England Population Health, Hunter Medical Research Institute

*Address:* Hunter New England Population Health, Hunter New England Local Health District, Locked Bag 10, Wallsend, NSW, 2287, Australia.

**Luke Wolfenden**

*Departments/Institutions:* Hunter New England Population Health, Hunter Medical Research Institute

*Address:* Hunter New England Population Health, Hunter New England Local Health District, Locked Bag 10, Wallsend, NSW, 2287, Australia.

**Jenny Bowman**

*Departments/Institutions:* The University of Newcastle

*Address:* The University of Newcastle, University Drive, Callaghan, NSW, 2308, Australia.

**Karen Gillham**

*Departments/Institutions:* Hunter New England Population Health, Hunter Medical Research Institute

*Address:* Hunter New England Population Health, Hunter New England Local Health District, Locked Bag 10, Wallsend, NSW, 2287, Australia.

**Julia Dray**

*Departments/Institutions:* The University of Newcastle, Hunter New England Population Health, Hunter Medical Research Institute

*Address:* Hunter New England Population Health, Hunter New England Local Health District, Locked Bag 10, Wallsend, NSW, 2287, Australia.

**John Wiggers**

*Departments/Institutions:* Hunter New England Population Health, Hunter Medical Research Institute, The University of Newcastle,

*Address:* Hunter New England Population Health, Hunter New England Local Health District, Locked Bag 10, Wallsend, NSW, 2287, Australia.

**Key words:** smoking; alcohol drinking; marijuana smoking; resilience, psychological; schools

**Word count:** 2,006

**ABSTRACT**

**Introduction:** Tobacco, alcohol and illicit drug use contribute significantly to global rates of morbidity and mortality. Despite evidence suggesting interventions designed to increase adolescent resilience may represent a means of reducing adolescent substance use, and schools providing a key opportunity to implement such interventions, existing systematic reviews assessing the effectiveness of such interventions targeting adolescent substance use have not examined this potential.

**Methods and analysis:** The aim of the systematic review is to determine whether interventions focused on enhancing the resilience of adolescents are effective in reducing adolescent substance use. Eligible studies will: include participants 18 years of age or under; report tobacco use, alcohol consumption or illicit drug use as outcomes; and implement a school-based intervention designed to promote internal (e.g. self-esteem) or external (e.g. school connectedness) resilience factors. Eligible study designs include randomised controlled trials, cluster randomised controlled trials, pre-post, quasi-randomised, stepped wedge, preference trials, quasi experimental, randomised encouragement trials, staggered enrolment trials, nonrandomised trials, time series trials, multiple baseline and regression discontinuity trials with a parallel control group. A search strategy including criteria for participants, study design, outcome, setting and intervention will be implemented in various electronic databases and information sources. Two reviewers will independently screen studies to assess eligibility, as well as extract data from, and assess risk of bias of, included studies. A third reviewer will resolve any discrepancies. Attempts will be made to quantify trial effects by meta-analysis. Binary outcomes will be pooled and effect size reported using odds ratios. For continuous data, effect size of trials will be reported using a mean difference where trial outcomes report the same outcome using a consistent measure, or standardised mean difference where trials report a comparable measure. Otherwise trial outcomes will be described narratively.

**Dissemination:** Review findings will be disseminated via peer-reviewed journals and conferences.

## INTRODUCTION

Tobacco, alcohol and illicit drug use contribute significantly to global rates of morbidity and mortality.[1, 2] School-based interventions have been recommended to be implemented to reduce this burden given initiation of such drug use typically occurs during adolescence,[3] and schools provide almost universal access to adolescents for prolonged periods. Given this, school-based interventions have been implemented by governments internationally in an attempt to reduce adolescent initiation to substance use.[4-6]

Despite widespread implementation, Cochrane reviews have found little evidence for the effectiveness of school-based drug prevention programs on adolescent substance use.[4-6] Of the multiple intervention approaches examined by such reviews, little or no evidence of effectiveness has been found for the most commonly implemented curricula or information-only interventions, whereas evidence has been found for interventions adopting a social competence, generic psychosocial or individual social skills approach.[4-6] A review by the World Health Organisation examining school-based drug prevention programs similarly concluded that programs that promote young people's mental wellbeing were most likely to be effective, suggesting that interventions incorporating a mental wellbeing approach may have the best chance of impacting on substance use.[7]

The concept of resilience and closely related research regarding protective factors provides one avenue for addressing mental wellbeing that is suggested to have an impact on adolescent substance use.[8-17] Both individual and environmental protective factors are thought to contribute to an individual's resilience, be critical for positive youth development, and protect adolescents from engaging in risk behaviours, such as substance use.[18-21] Individual, or internal resilience factors refer to the personal skills and traits of young people (including self-esteem, empathy, and self-awareness).[22] Environmental, or external resilience factors refer to the positive influences within a young person's social environment (including connectedness to family, school and community).[22] Various studies have reported such factors to be negatively associated with adolescent substance use, [12, 16, 23-35] for example higher self-esteem [16, 28, 31, 34] associated with a lower likelihood of tobacco, alcohol and illicit drug use.

1  
2  
3  
4  
5 Despite this associative evidence, and the systematic review evidence for conceptually overlapping  
6 intervention approaches such individual social skills, to the authors knowledge existing systematic reviews  
7 assessing the effectiveness of school-based substance use interventions have not examined this potential  
8 specifically.[4-6, 36] A systematic synthesis of studies defined as adopting an intervention approach that  
9 addresses the internal and external resilience factors in schools is required to determine whether such an  
10 approach is effective in reducing adolescent substance use.  
11  
12  
13  
14  
15

### 16 17 18 19 20 **Objective**

21 To determine if school-based interventions designed to enhance resilience are effective relative to a  
22 comparison group in reducing the extent of adolescent tobacco, alcohol or illicit drug use.  
23  
24  
25  
26

### 27 28 **METHODS**

29 All methods employed in the review will be consistent with the Cochrane Handbook for Systematic Reviews  
30 of Interventions.[37]  
31  
32  
33  
34  
35

### 36 **Eligibility criteria**

37 Study characteristics

#### 38 *Participants*

39  
40 Studies will be included if they report results of participants aged 18 years or under. Studies that select  
41 participants based on a diagnosis of a psychiatric or other mental illness, cognitive or developmental  
42 disability will be excluded from the study. There will be no exclusions on the basis of study country.  
43  
44  
45  
46  
47  
48  
49

#### 50 *Study design*

51 Studies with the following designs will be included: randomised controlled trials, cluster randomised  
52 controlled trials, pre-post, quasi-randomised, stepped wedge, preference trials, quasi experimental,  
53 randomised encouragement trials, staggered enrolment trials, nonrandomised trials, time series trials,  
54 multiple baseline and regression discontinuity trials. Trials with non-random assignment of groups will be  
55  
56  
57  
58  
59  
60

1 included given Medical Research Council recommendations that non-randomised designs may represent the  
2 most appropriate evaluation design for some complex public health interventions,[38] and as an  
3 acknowledgment of the value of non-randomised designs in assessing intervention effects in public health  
4 interventions.[39] Studies with any length of follow-up will be included in the review. Studies will be  
5 excluded if they do not include a parallel comparison group.  
6  
7  
8  
9  
10

#### 11 *Comparison group*

12 The comparison group may have received no intervention, usual practice, attention only or an alternate  
13 intervention.  
14  
15  
16  
17  
18  
19  
20

#### 21 *Primary outcomes*

22 Studies will be included if they report one or more of the following outcomes:

- 23 - tobacco use (including ever smoked, tobacco use in last week, or current smoking status);
- 24 - alcohol consumption (including ever consumed an alcoholic drink, alcohol use in last week, frequency of
- 25 alcohol consumption);
- 26 - illicit drug use (including ever use or frequency of use of cannabis, amphetamines, cocaine).
- 27  
28  
29  
30  
31  
32  
33  
34  
35

36 Substance use data collected via various methods will be included, for example data collected via  
37 observation; self-report via face to face or telephone, internet survey; secondary report by peers or parents;  
38 and biochemical measurement of substance use (such as carbon monoxide or cotinine detection).  
39  
40  
41  
42  
43

#### 44 *Secondary outcomes*

45 Any adverse outcomes reported in included studies will be described in the results.  
46  
47  
48  
49  
50

#### 51 *Interventions*

52 Studies will be included if they report interventions that address student resilience in some way, irrespective  
53 of whether substance use is the primary outcome measure of the study. A broad definition of resilience will  
54 be employed to identify eligible studies, with a study included if it reports an intervention based on resilience  
55 or any known internal or external resilience factor (including internal resilience factors: cooperation and  
56  
57  
58  
59  
60

1 communication, self-efficacy, empathy, problem solving, self-awareness, goals and aspirations; and/or  
2 external resilience factors: school support, school meaningful participation, community support, community  
3 meaningful participation, home support, home meaningful participation, peer caring relationships, and pro-  
4 social peers).[40] Interventions described as strengths-based,[41] social and emotional learning/wellbeing,  
5 mental wellbeing, psycho-social wellbeing, and mental health will be included in the review if they address  
6 an internal or external resilience factor. Studies will be assessed to determine whether they are: entirely  
7 focused on resilience and address both internal and external resilience (comprehensive); entirely focused on  
8 one such type of factor (uni-dimensional); or a component of the intervention is focused on a small number  
9 of such factors (partial).

10  
11  
12  
13  
14  
15  
16  
17  
18  
19  
20  
21  
22 There will be no exclusion criteria regarding other intervention elements, the duration of intervention, the  
23 format of intervention delivery (for example curricula-based or internet-based), or the intervention  
24 administration (for example the intervention could be delivered by school-staff, research staff, community  
25 members or students).

### 26 27 28 29 30 31 32 *Setting*

33  
34 Studies will be included if the intervention is implemented in a school.

### 35 36 37 38 39 40 41 42 43 44 45 46 47 48 49 50 51 52 53 54 55 56 57 58 59 60 **Publication characteristics**

Studies of any language will be included and translated using Google translate where required. Studies published in the last 20 years in peer reviewed journals will be eligible for inclusion.

### **Information sources**

#### Electronic databases

The following electronic databases will be searched: Cochrane Central Register of Controlled Trials, MEDLINE, EMBASE, CINAH, PsycINFO, ERIC and the first 200 citations only of Google scholar.

#### Other sources

The following additional information sources will be searched or contacted for eligible studies:

- 1 - Hand searching of three relevant journals in the field (last 5 years) (Addiction, Journal of Adolescent  
2 Health, Journal of School Health);  
3  
4  
5 - Reference lists of included studies;  
6  
7 - Reference lists of existing Cochrane reviews on school-based interventions targeting tobacco, alcohol and  
8 illicit substances;[4-6]  
9  
10  
11 - Corresponding authors of included studies.  
12  
13

### 14 **Search strategy**

15  
16 The search strategy will include terms for participants, setting, intervention, study design[42] and outcome  
17 (sourced from current Cochrane systematic reviews examining the effectiveness of tobacco, alcohol and  
18 illicit substance use interventions; see Web Only Appendix 1 for Medline search strategy).[4-6] The search  
19 strategy will be tailored as required for implementation in other information sources.  
20  
21  
22  
23  
24  
25  
26  
27

### 28 **Study selection**

29  
30 Two reviewers will independently screen the titles and abstracts of all studies identified via the  
31 implementation of the above search strategy. The reviewers will not be blind to study authors. A  
32 standardised screening tool will be used to assess study eligibility with those titles and abstracts not meeting  
33 the criteria excluded from the review. The full texts of the remaining papers will be sourced and examined  
34 independently by the two reviewers to assess study eligibility. Any disagreement between the two reviewers  
35 regarding study eligibility, that cannot be resolved via consensus, will be assessed by a third reviewer.  
36 Corresponding authors will be contacted if there is not sufficient information to determine eligibility. If  
37 sufficient information remains unavailable, the study will be deemed ineligible. The details of ineligible  
38 studies for which the full text was sourced will be reported in the results section including the reason the  
39 study was ineligible.  
40  
41  
42  
43  
44  
45  
46  
47  
48  
49  
50  
51

### 52 **Data extraction**

53  
54 The two study reviewers will independently extract data from the eligible studies using a standardised form.  
55 Reviewers will not be blind to study authors. Any unresolved discrepancies between reviewers regarding the  
56  
57  
58  
59  
60



1  
2  
3  
4  
5  
6  
7  
8  
9  
10  
11  
12  
13  
14  
15  
16  
17  
18  
19  
20  
21  
22  
23  
24  
25  
26  
27  
28  
29  
30  
31  
32  
33  
34  
35  
36  
37  
38  
39  
40  
41  
42  
43  
44  
45  
46  
47  
48  
49  
50  
51  
52  
53  
54  
55  
56  
57  
58  
59  
60

extracted data will be resolved by the third reviewer. Where there is insufficient data to make a judgement regarding eligibility, the corresponding authors will be contacted for clarification.

The following information will be extracted from eligible studies where available: authors, year of publication, year/s of study, country, study design, intervention (including resilience factor targeted, duration, intensity), comparison group type, substance use targeted, study participants' demographics (including age and gender), study results (including sample size, consent rate/s, participation rate/s, length of follow up, attrition, relevant outcome results and intra-class correlation), measurement tool characteristics, intervention fidelity (including any process measures) and information to determine any potential study bias (see below).

#### **Assessment of risk of bias**

Study bias of eligible studies will be assessed independently by the two reviewers against the Cochrane Handbook for Systematic Reviews of Interventions study characteristics including: sequence generation (selection bias), allocation sequence concealment (selection bias), blinding of participants and personnel (performance bias), blinding of outcome assessment (detection bias), incomplete outcome data (attrition bias), selective outcome reporting (reporting bias) and other potential sources of bias.[37]

Included non-RCTs will be assessed for selection bias that may have resulted in confounding of the outcome of interest, and where possible statistical methods will adjust for such confounding. Any additional biases specific to individual study designs will be assessed by the reviewers and reported.[37]

The reviewers will not be blinded to the names of the authors, institutions, journal or results of studies. Any disagreement between the two reviewers regarding study bias that is not resolved via discussion will be resolved by a third reviewer.

#### **Data analysis**

Data synthesis and analysis

1 Attempts will be made to quantify trial effects by meta-analysis using data from intention to treat analyses.  
2  
3 Where multiple measures (for example biochemical and self-reported smoking status) for the same outcome  
4 are reported, the most objective measure of outcome will be used. Similarly, where studies report data from  
5 multiple follow-up periods, data from final follow up periods will be extracted. Binary outcomes, (such as  
6 tobacco use) will be pooled and effect size reported using odds ratios. For continuous data, the effect size of  
7 trials will be reported using a mean difference where trial outcomes are reported using a consistent measure,  
8 or a standardised mean difference where outcomes across trials report the same outcome using comparable  
9 measures. Sensitivity analysis will be conducted excluding trials judged to be at high risk of bias. Meta-  
10 analyses will be performed using a random effects model, when there is little evidence of heterogeneity  
11 ( $I^2 < 50\%$ ) and only for randomised trials. Otherwise trial outcomes will be described narratively.  
12  
13  
14  
15  
16  
17  
18  
19  
20  
21  
22  
23

#### 24 Assessment of study heterogeneity

25 Study heterogeneity will be assessed via examination of forest plots and calculation of  $I^2$  statistic. If an  $I^2$   
26 score over 50% is found, the cause of the heterogeneity will be explored via the conduct of subgroup  
27 analyses.  
28  
29  
30  
31  
32  
33

#### 34 Issues of clustering

35 If any included cluster randomised controlled trials have not accounted for clustering, intra-class correlations  
36 will be requested from authors or if not available, estimates from similar studies will be used to adjust for  
37 clustering.  
38  
39  
40  
41  
42  
43

#### 44 Assessment of reporting bias

45 Possible reporting bias will be determined by examining funnel plots of the included studies and comparison  
46 with trial registers.  
47  
48  
49  
50  
51  
52

#### 53 Additional analyses

54 If possible, additional analyses will be conducted by subgroup (e.g. gender), intervention intensity,  
55 intervention duration and length of follow up.  
56  
57  
58  
59  
60

## ETHICS AND DISSEMINATION

Given this is a systematic review, ethics approval is not required. Findings of this review will be disseminated via peer-reviewed journals and conference presentations.

## DISCUSSION

This systematic review will be the first internationally to examine the effectiveness of school-based resilience interventions in reducing the prevalence of adolescent tobacco, alcohol and illicit drug use. Given the majority of adolescents attend school, population level implementation of an effective intervention approach has the potential to provide significant health gains by reducing adolescent substance use, and as a result will be of interest to researchers and policy makers.

## AUTHORS' CONTRIBUTIONS

RH led the drafting of the protocol and will lead the review. All authors contributed to the refinement of the review protocol, approved the final manuscript and will be involved in the preparation of the review.

## COMPETING INTERESTS STATEMENT

The authors are currently undertaking a randomised controlled trial of a school-based resilience intervention to decrease adolescent substance use. The authors have not received any benefit, in cash or in kind, any hospitality or any subsidy from the alcohol industry or any other source perceived to have an interest in the outcome of this review.

## FUNDING STATEMENT

This research received no specific grant from any funding agency in the public, commercial or not-for-profit sectors.

1  
2  
3  
4  
5  
6  
7  
8  
9  
10  
11  
12  
13  
14  
15  
16  
17  
18  
19  
20  
21  
22  
23  
24  
25  
26  
27  
28  
29  
30  
31  
32  
33  
34  
35  
36  
37  
38  
39  
40  
41  
42  
43  
44  
45  
46  
47  
48  
49  
50  
51  
52  
53  
54  
55  
56  
57  
58  
59  
60

For peer review only

## REFERENCES

1. Begg S, Vos T, Barker B et al. The burden of disease and injury in Australia 2003. 2007. PHE 82, Canberra, AIHW.
2. Lopez AD. Global burden of disease and risk factors. 2006. Washington D.C., Oxford University Press.
3. Gilman SE, Abrams DB, Buka SL. Socioeconomic status over the life course and stages of cigarette use: initiation, regular use, and cessation. *Journal of Epidemiology & Community Health* 2003; **57**(10):802-808.
4. Faggiano F, Vigna-Taglianti FD, Versino E et al. School-based prevention for illicit drugs' use. *Cochrane Database of Systematic Reviews* 2005;(2):CD003020.
5. Foxcroft DR, Tsertsvadze A. Universal school-based prevention programs for alcohol misuse in young people. *Cochrane Database of Systematic Reviews* 2011; **5**:CD009113.
6. Thomas RE, McLellan J, Perera R. School-based programmes for preventing smoking. *Cochrane Database of Systematic Reviews* 2013; **Issue 4**(Art. No.: CD001293. DOI: 10.1002/14651858.CD001293.pub3).
7. Stewart-Brown S. What is the evidence on school health promotion in improving health or preventing disease and, specifically, what is the effectiveness of the health promoting schools approach? 2006. Copenhagen, WHO Regional Office for Europe (Health Evidence Network report).
8. Resnick MD. Resilience and protective factors in the lives of adolescents. *J Adolesc Health* 2000; **27**(1):1-2.
9. Masten AS. Ordinary magic. Resilience processes in development. *Am Psychol* 2001; **56**(3):227-238.
10. Luthar SS, Cicchetti D, Becker B. The construct of resilience: a critical evaluation and guidelines for future work. *Child Dev* 2000; **71**(3):543-562.
11. Greenberg MT, Weissberg RP, O'Brien MU et al. Enhancing school-based prevention and youth development through coordinated social, emotional, and academic learning. *American Psychologist* 58(6-7):466-74, 2003;-Jul.
12. Fergus S, Zimmerman MA. Adolescent resilience: a framework for understanding healthy development in the face of risk. *Annu Rev Public Health* 2005; **26**:399-419.
13. Harvey J, Delfabbro PH. Psychological resilience in disadvantaged youth: A critical overview. *Australian Psychologist* 2004; **39**(1):3-13.
14. Catalano RF, Berglund ML, Ryan JAM et al. Positive Youth Development in the United States: Research Findings on Evaluations of Positive Youth Development Programs. *Ann Am Acad Pol Soc Sci* 2004; **591**(97):124.
15. Greenberg MT. Promoting resilience in children and youth: preventive interventions and their interface with neuroscience. *Ann N Y Acad Sci* 2006; **1094**:139-150.
16. Resnick MD, Bearman PS, Blum RW et al. Protecting adolescents from harm. Findings from the National Longitudinal Study on Adolescent Health. *JAMA* 1997; **278**(10):823-832.
17. Resnick MD. Protective factors, resiliency and healthy youth development. *Adolescent Medicine: State of the Art Reviews* 2000; **11**(1):157-164.

18. Benard B. *Fostering Resiliency in Urban Schools. Closing the achievement gap: A vision for changing beliefs and practices.* Virginia: Association for Supervision and Curriculum Development 1996.
19. Benard B. *Protective factors in the family, school, and community.* Portland, OR: Western Center for Drug-Free Schools and Communities 1991
20. Bernat DH, Resnick MD. *Healthy youth development: science and strategies.* *Journal of Public Health Management & Practice* 2006; **Suppl**:S10-S16.
21. Toumbourou JW. *Drug Prevention Strategies: A Developmental Settings Approach Prevention Research Evaluation Report Number 2.* 2002. Melbourne, Australian Drug Foundation.
22. MindMatters Evaluation Consortium. *Report of the MindMatters (National Mental Health in Schools Project) Evaluation Project, vols. 1-4.* 2000. Newcastle, Hunter Institute of Mental Health.
23. Bond L, Butler H, Thomas L et al. *Social and school connectedness in early secondary school as predictors of late teenage substance use, mental health, and academic outcomes.* *J Adolesc Health* 2007; **40**(4):357.e9-357.e18.
24. Carvajal SC, Granillo TM. *A prospective test of distal and proximal determinants of smoking initiation in early adolescents.* *Addict Behav* 2006; **31**(4):649-660.
25. Fang L, Barnes-Ceeney K, Schinke SP. *Substance use behavior among early-adolescent Asian American girls: the impact of psychological and family factors.* *Women & Health* 2011; **51**(7):623-642.
26. Haegerich TM, Tolan PH. *Core competencies and the prevention of adolescent substance use.* *New Directions for Child & Adolescent Development* 2008; **2008**(122):47-60.
27. Hiemstra M, Otten R, Engels RC. *Smoking onset and the time-varying effects of self-efficacy, environmental smoking, and smoking-specific parenting by using discrete-time survival analysis.* *Journal of Behavioral Medicine* 2012; **35**(2):240-251.
28. Kavas AB. *Self-esteem and health-risk behaviors among Turkish late adolescents.* *Adolescence* 2009; **44**(173):187-198.
29. McLellan L, Rissel C, Donnelly N et al. *Health behaviour and the school environment in New South Wales, Australia.* *Social Science & Medicine* 1999; **49**(5):611-619.
30. Neumark-Sztainer D, Story M, French SA et al. *Psychosocial correlates of health compromising behaviors among adolescents.* *Health Educ Res* 1997; **12**(1):37-52.
31. Patton GC, Bond L, Carlin JB et al. *Promoting social inclusion in schools: a group-randomized trial of effects on student health risk behavior and well-being.* *Am J Public Health* 2006; **96**(9):1582-1587.
32. Piko BF, Kovacs E. *Do parents and school matter? Protective factors for adolescent substance use.* *Addict Behav* 2010; **35**(1):53-56.
33. Vuille JC, Schenkel M. *Social equalization in the health of youth. The role of the school.* *European Journal of Public Health* 2001; **11**(3):287-293.
34. Wiefferink CH, Peters L, Hoekstra F et al. *Clustering of health-related behaviors and their determinants: possible consequences for school health interventions.* *Prevention Science* 2006; **7**(2):127-149.
35. Wright LL, Palfai TP. *Life goal appraisal and marijuana use among college students.* *Addict Behav* 2012; **37**(7):797-802.

- 1 36. Thomas R, Perera R. School-based programmes for preventing smoking. *Cochrane Database of*  
2 *Systematic Reviews* 2006; **3**:CD001293.
- 3
- 4 37. Higgins JPT, Green S. *Cochrane Handbook for Systematic Reviews of Interventions*. Version 5.1.0  
5 [updated March 2011]. Higgins JPT, Green S, editors. The Cochrane Collaboration, 2011. 2011.
- 6
- 7 38. Craig P, Dieppe P, Macintyre S et al. *Developing and evaluating complex interventions: new guidance*.  
8 2008. Medical Research Council.
- 9
- 10 39. Armstrong R, Waters E, Jackson N et al. *Guidelines for systematic reviews of health promotion and*  
11 *public health interventions*. [Version 2]. 2007. Australia, Melbourne University.
- 12
- 13 40. Hanson TL, Kim JO. *Measuring resilience and youth development: the psychometric properties of the*  
14 *Healthy Kids Survey*. 2007. Washington, DC, U.S. Department of Education, Institute of Education  
15 Sciences, National Centre for Education Evaluation and Regional Assistance, Regional Educational  
16 Laboratory West.
- 17
- 18 41. Brownlee K, Rawana J, Franks J et al. A systematic review of strengths and resilience outcome  
19 literature relevant to children and adolescents. *Child & Adolescent Social Work Journal* 2013;No.
- 20
- 21 42. Kingsland M, Wiggers J, Wolfenden L. Interventions in sports settings to reduce alcohol consumption  
22 and alcohol-related harm: a systematic review. *BMJ Open* 2[2], 1-6. 6-4-2012. United Kingdom, BMJ  
23 Group.
- 24
- 25
- 26
- 27
- 28
- 29
- 30
- 31
- 32
- 33
- 34
- 35
- 36
- 37
- 38
- 39
- 40
- 41
- 42
- 43
- 44
- 45
- 46
- 47
- 48
- 49
- 50
- 51
- 52
- 53
- 54
- 55
- 56
- 57
- 58
- 59
- 60

**APPENDIX 1**

Database: Ovid MEDLINE(R) 1946 to Present with Daily Update

Search Strategy:

1 (prevent\* or stop\* or quit\* or abstin\* or abstain\* or reduc\* or "tobacco use disorder" or ex-smoker or freedom from smoking or anti-smok\*).mp. [mp=title, abstract, original title, name of substance word, subject heading word, keyword heading word, protocol supplementary concept, rare disease supplementary concept, unique identifier] (2949486)

2 exp smoking/ or smoking.mp. or smoking cessation.mp. or exp smoking cessation/ or smok\*.mp. or noticine.mp. or tobacco.mp. or exp tobacco/ [mp=title, abstract, original title, name of substance word, subject heading word, keyword heading word, protocol supplementary concept, rare disease supplementary concept, unique identifier] (244905)

3 1 and 2 (75169)

4 exp alcohols/ad, ae (75999)

5 exp alcohol drinking/ (50226)

6 exp alcohol abuse/ (66163)

7 exp alcohol, ethyl/ae (7478)

8 exp alcohol abuse/mo, pc, rh, th (18949)

9 alcohol\*.ti,ab. (209848)

10 drink\*.ti,ab. (87398)

11 drunk\*.ti,ab. (3138)

12 intoxicat\*.ti,ab. (34927)

13 or/4-12 (382204)

14 cannabis.mp. or exp Cannabis/ (11714)

15 exp Marijuana Smoking/ (2487)

16 marijuana.mp. (11285)

17 street drugs.mp. or exp Street Drugs/ (9005)



- 1  
2  
3  
4  
5  
6  
7  
8  
9  
10  
11  
12  
13  
14  
15  
16  
17  
18  
19  
20  
21  
22  
23  
24  
25  
26  
27  
28  
29  
30  
31  
32  
33  
34  
35  
36  
37  
38  
39  
40  
41  
42  
43  
44  
45  
46  
47  
48  
49  
50  
51  
52  
53  
54  
55  
56  
57  
58  
59  
60
- 18 exp substance-related disorders/ (359827)
- 19 addict\*.ab,ti. (37697)
- 20 (abus\* or use\*).ab,ti. (4111763)
- 21 morphine.ab,ti. (38748)
- 22 hashish.mp. (457)
- 23 heroin.ab,ti. (9943)
- 24 "heroin dependence".mp. (7920)
- 25 exp \*n-methyl-3-4-methylenedioxyamphetamine/ or "ecstasy".mp. or "MDMA".mp. (4187)
- 26 exp \*hallucinogens/ or "hallucinogens".mp. (16151)
- 27 exp \*cocaine/ or exp \*crack cocaine/ or "cocaine".mp. (33227)
- 28 exp \*lysergic acid diethylamide/ or "lsd".mp. (4386)
- 29 or/14-28 (4402741)
- 30 risk-taking.mp. or exp Risk-Taking/ (23020)
- 31 risk behaviours.mp. (1383)
- 32 health risks.mp. (8865)
- 33 exp Health Behavior/ or health behaviours.mp. (94401)
- 34 or/30-33 (123513)
- 35 3 or 13 or 29 or 34 (4678307)
- 36 school.mp. or exp Schools/ (199868)
- 37 school health services.mp. or exp School Health Services/ (18410)
- 38 (school\* adj3 (intervention\* or program\* or course\* or polic\* or practice\* or curricul\* or  
49 environment\*)),mp. (15226)
- 39 or/36-38 (201010)
- 40 exp Child/ or child.mp. (1630031)
- 41 exp Adolescent/ or adolescent.mp. (1581151)

- 1  
2 42 (adolescen\* or student\* or class\*).mp. [mp=title, abstract, original title, name of substance word,  
3 subject heading word, keyword heading word, protocol supplementary concept, rare disease supplementary  
4 concept, unique identifier] (2503330)  
5  
6  
7 43 (teenage\* or youth).ti,ab. (43859)  
8  
9  
10 44 (early adj2 adult\*).ti,ab. (5053)  
11  
12 45 (young adj2 adult\*).ti,ab. (56450)  
13  
14 46 exp students/ (77794)  
15  
16 47 (young people or youth).mp. [mp=title, abstract, original title, name of substance word, subject heading  
17 word, keyword heading word, protocol supplementary concept, rare disease supplementary concept, unique  
18 identifier] (47625)  
19  
20  
21 48 or/40-47 (3361720)  
22  
23 49 exp Resilience, Psychological/ (1218)  
24  
25 50 (resilience or resilienc\*).mp. [mp=title, abstract, original title, name of substance word, subject heading  
26 word, keyword heading word, protocol supplementary concept, rare disease supplementary concept, unique  
27 identifier] (7080)  
28  
29  
30 51 emotional intelligence.mp. or exp Emotional Intelligence/ (60696)  
31  
32  
33 52 mental health.mp. or exp Mental Health/ (104258)  
34  
35  
36 53 mental wellbeing.mp. (138)  
37  
38  
39 54 communication/ or cooperative behavior/ or self efficacy/ or empathy/ or problem solving/ or self  
40 concept/ or goals/ or "aspirations (psychology)"/ or social environment/ (209017)  
41  
42 55 Adolescent Development/ or youth development.mp. or Child Development/ (35780)  
43  
44 56 (school\* adj3 engage\*).mp. (316)  
45  
46 57 (school\* adj3 connect\*).mp. (330)  
47  
48 58 (communit\* adj3 support\*).mp. (4200)  
49  
50 59 social participation/ or family/ or parent-child relations/ or family relations/ or peer group/ or social  
51 support/ or friends/ (144179)  
52  
53  
54 60 pro-social peers.mp. (2)  
55  
56 61 (positive adj3 (peer\* or friend\*)).mp. (486)  
57  
58  
59  
60

- 1  
2  
3  
4  
5  
6  
7  
8  
9  
10  
11  
12  
13  
14  
15  
16  
17  
18  
19  
20  
21  
22  
23  
24  
25  
26  
27  
28  
29  
30  
31  
32  
33  
34  
35  
36  
37  
38  
39  
40  
41  
42  
43  
44  
45  
46  
47  
48  
49  
50  
51  
52  
53  
54  
55  
56  
57  
58  
59  
60
- 62 life skill\*.mp. (593)
- 63 social environment.mp. or exp Social Environment/ (89397)
- 64 interpersonal relations.mp. or exp Interpersonal Relations/ (251156)
- 65 emotional wellbeing.mp. (202)
- 66 or/49-65 (661242)
- 67 randomized controlled trial.pt. (367158)
- 68 controlled clinical trial.pt. (87691)
- 69 (randomised or randomized).ab. (318587)
- 70 clinical trials as topic.sh. (169978)
- 71 randomly.ab. (187790)
- 72 trial.ti. (115019)
- 73 doubleblind.ab. (151)
- 74 singleblind.ab. (9)
- 75 experiment\*.mp. (1466450)
- 76 (pretest or pre test).mp. (9609)
- 77 (posttest or post test).mp. (9762)
- 78 (pre post or prepost).mp. (3758)
- 79 before after.mp. (2409)
- 80 (quasi-randomised or quasi-randomized or quazi-randomised or quazi-randomized).mp. (2369)
- 81 stepped wedge.mp. (67)
- 82 preference trial.mp. (41)
- 83 comprehensive cohort.mp. (49)
- 84 natural experiment.mp. (674)
- 85 (quasi experiment\* or quazi experiment\*).mp. [mp=title, abstract, original title, name of substance word, subject heading word, keyword heading word, protocol supplementary concept, rare disease supplementary concept, unique identifier] (4811)

- 1  
2 86 (randomised encouragement trial or randomized encouragement trial).mp. (3)  
3  
4 87 staggered enrolment trial of staggered enrollment trial.mp. (0)  
5  
6 88 (nonrandomised or non randomised or nonrandomized or non randomized).mp. (13227)  
7  
8  
9 89 interrupted time series.mp. (840)  
10  
11 90 (time series and trial).mp. (737)  
12  
13 91 multiple baseline.mp. (1262)  
14  
15 92 regression discontinuity.mp. (39)  
16  
17  
18 93 or/67-92 (2256891)  
19  
20 94 35 and 39 and 48 and 66 and 93 (1936)  
21  
22  
23  
24  
25  
26  
27  
28  
29  
30  
31  
32  
33  
34  
35  
36  
37  
38  
39  
40  
41  
42  
43  
44  
45  
46  
47  
48  
49  
50  
51  
52  
53  
54  
55  
56  
57  
58  
59  
60

# BMJ Open

## Systematic review of universal school-based resilience interventions targeting adolescent tobacco, alcohol or illicit drug use: review protocol

|                                 |                                                                                                                                                                                                                                                                                                                                                                                                                                                                                                                                                                                                                                                                                                                                                          |
|---------------------------------|----------------------------------------------------------------------------------------------------------------------------------------------------------------------------------------------------------------------------------------------------------------------------------------------------------------------------------------------------------------------------------------------------------------------------------------------------------------------------------------------------------------------------------------------------------------------------------------------------------------------------------------------------------------------------------------------------------------------------------------------------------|
| Journal:                        | <i>BMJ Open</i>                                                                                                                                                                                                                                                                                                                                                                                                                                                                                                                                                                                                                                                                                                                                          |
| Manuscript ID:                  | bmjopen-2013-004718.R1                                                                                                                                                                                                                                                                                                                                                                                                                                                                                                                                                                                                                                                                                                                                   |
| Article Type:                   | Protocol                                                                                                                                                                                                                                                                                                                                                                                                                                                                                                                                                                                                                                                                                                                                                 |
| Date Submitted by the Author:   | 23-Apr-2014                                                                                                                                                                                                                                                                                                                                                                                                                                                                                                                                                                                                                                                                                                                                              |
| Complete List of Authors:       | Hodder, Rebecca; Hunter New England Local Health District, Hunter New England Population Health; The University of Newcastle, Freund, Megan; Hunter New England Local Health District, Hunter New England Population Health; Hunter Medical Research Institute, Wolfenden, Luke; Hunter Medical Research Institute, Bowman, Jenny; The University of Newcastle, Gillham, Karen; Hunter New England Local Health District, Hunter New England Population Health; Hunter Medical Research Institute, Dray, Julia; Hunter New England Local Health District, Hunter New England Population Health; The University of Newcastle, Wiggers, John; Hunter New England Local Health District, Hunter New England Population Health; The University of Newcastle, |
| <b>Primary Subject Heading</b>: | Mental health                                                                                                                                                                                                                                                                                                                                                                                                                                                                                                                                                                                                                                                                                                                                            |
| Secondary Subject Heading:      | Smoking and tobacco, Public health, Addiction                                                                                                                                                                                                                                                                                                                                                                                                                                                                                                                                                                                                                                                                                                            |
| Keywords:                       | MENTAL HEALTH, Substance misuse < PSYCHIATRY, RESILIENCE, ADOLESCENCE                                                                                                                                                                                                                                                                                                                                                                                                                                                                                                                                                                                                                                                                                    |
|                                 |                                                                                                                                                                                                                                                                                                                                                                                                                                                                                                                                                                                                                                                                                                                                                          |

SCHOLARONE™  
Manuscripts

**TITLE:** Systematic review of universal school-based resilience interventions targeting adolescent tobacco, alcohol or illicit drug use: review protocol

**CORRESPONDING AUTHOR:**

Rebecca Kate Hodder

*Departments/Institutions:* Hunter New England Population Health, Hunter New England Local Health District; The University of Newcastle; Hunter Medical Research Institute

*Address:* Hunter New England Population Health, Hunter New England Local Health District, Locked Bag 10, Wallsend, NSW, 2287, Australia.

*Email:* [Rebecca.hodder@hnehealth.nsw.gov.au](mailto:Rebecca.hodder@hnehealth.nsw.gov.au);

*Telephone:* +61 2 4924 6499;

*Fax:* +61 2 4924 6215

**CO-AUTHORS:**

**Megan Freund**

*Departments/Institutions:* The University of Newcastle, Hunter New England Population Health, Hunter Medical Research Institute

*Address:* Hunter New England Population Health, Hunter New England Local Health District, Locked Bag 10, Wallsend, NSW, 2287, Australia.

**Luke Wolfenden**

*Departments/Institutions:* The University of Newcastle, Hunter Medical Research Institute

*Address:* C/-Hunter New England Population Health, Hunter New England Local Health District, Locked Bag 10, Wallsend, NSW, 2287, Australia.

**Jenny Bowman**

*Departments/Institutions:* The University of Newcastle

*Address:* The University of Newcastle, University Drive, Callaghan, NSW, 2308, Australia.

**Karen Gillham**

*Departments/Institutions:* Hunter New England Population Health, Hunter Medical Research Institute

*Address:* Hunter New England Population Health, Hunter New England Local Health District, Locked Bag 10, Wallsend, NSW, 2287, Australia.

**Julia Dray**

*Departments/Institutions:* The University of Newcastle, Hunter New England Population Health, Hunter Medical Research Institute

*Address:* Hunter New England Population Health, Hunter New England Local Health District, Locked Bag 10, Wallsend, NSW, 2287, Australia.

**John Wiggers**

*Departments/Institutions:* School of Medicine and Public Health, University of Newcastle; Hunter New England Population Health, Hunter Medical Research Institute

*Address:* Locked Bag 10, Wallsend, NSW, 2287, Australia.

**Key words:** smoking; alcohol drinking; marijuana smoking; resilience, psychological; schools

**Word count:** 2,493

## ABSTRACT

**Introduction:** Tobacco, alcohol and illicit drug use contribute significantly to global rates of morbidity and mortality. Despite evidence suggesting interventions designed to increase adolescent resilience may represent a means of reducing adolescent substance use, and schools providing a key opportunity to implement such interventions, existing systematic reviews assessing the effectiveness of school-based interventions targeting adolescent substance use have not examined this potential.

**Methods and analysis:** The aim of the systematic review is to determine whether universal interventions focused on enhancing the resilience of adolescents are effective in reducing adolescent substance use. Eligible studies will: include participants 5-18 years of age; report tobacco use, alcohol consumption or illicit drug use as outcomes; and implement a school-based intervention designed to promote both internal (e.g. self-esteem) and external (e.g. school connectedness) resilience factors. Eligible study designs include randomised controlled trials, cluster randomised controlled trials, staggered enrolment trials, stepped wedged trials, quasi-randomised trials, quasi experimental trials, time series/interrupted time-series trials, preference trials, regression discontinuity trials and natural experiment studies with a parallel control group. A search strategy including criteria for participants, study design, outcome, setting and intervention will be implemented in various electronic databases and information sources. Two reviewers will independently screen studies to assess eligibility, as well as extract data from, and assess risk of bias of, included studies. A third reviewer will resolve any discrepancies. Attempts will be made to quantify trial effects by meta-analysis. Binary outcomes will be pooled and effect size reported using odds ratios. For continuous data, effect size of trials will be reported using a mean difference where trial outcomes report the same outcome using a consistent measure, or standardised mean difference where trials report a comparable measure. Otherwise trial outcomes will be described narratively.

**Dissemination:** Review findings will be disseminated via peer-reviewed journals and conferences.

## INTRODUCTION

Tobacco, alcohol and illicit drug use contribute significantly to global rates of morbidity and mortality.[1, 2] School-based interventions have been recommended to be implemented to reduce this burden given initiation of such drug use typically occurs during adolescence,[3] and schools provide almost universal access to adolescents for prolonged periods. Given this, school-based interventions have been implemented by governments internationally in an attempt to reduce adolescent initiation to substance use.[4-6]

Despite widespread implementation, Cochrane reviews have found little evidence for the effectiveness of school-based drug prevention programs on adolescent substance use, with such reviews focused on any or only universal intervention approaches.[4-6] Of the multiple intervention approaches examined by such reviews, little or no evidence of effectiveness has been found for the most commonly implemented curricula or information-only interventions. Some evidence however has been found for various psychosocial interventions, including those that adopt a social competence and social influence, generic psychosocial or individual social skills approach.[4-6] A review by the World Health Organisation examining school-based drug prevention programs similarly concluded that programs that promote young people's mental wellbeing were most likely to be effective, suggesting that interventions incorporating a mental wellbeing approach may have the best chance of impacting on substance use.[7]

The concept of resilience and closely related research regarding protective factors provides one avenue for addressing mental wellbeing that is suggested to have an impact on adolescent substance use.[8-17] Resilience has been variably defined as the process of, capacity for, or outcomes of successful adaptation in the context of risk or adversity.[9, 10, 12, 13, 18] Despite this variability, it is generally agreed that a range of both individual and environmental protective factors are thought to: contribute to an individual's resilience; be critical for positive youth development; and protect



1  
2  
3 adolescents from engaging in risk behaviours, such as substance use.[19-22] Individual, or internal  
4  
5 resilience factors refer to the personal skills and traits of young people (including self-esteem,  
6  
7 empathy, and self-awareness).[23] Environmental, or external resilience factors refer to the positive  
8  
9 influences within a young person's social environment (including connectedness to family, school and  
10  
11 community).[23] Various studies have separately reported such factors to be negatively associated  
12  
13 with adolescent use of different types of substances, [12, 16, 24-36] for example higher self-esteem  
14  
15 [16, 29, 32, 35] associated with a lower likelihood of tobacco and with lower likelihood of alcohol  
16  
17 use.  
18  
19  
20  
21  
22

23 Despite this associative evidence, to the authors knowledge existing systematic reviews assessing the  
24  
25 effectiveness of school-based substance use interventions have not reported the effectiveness of  
26  
27 universal resilience-based interventions on adolescent use of multiple substances.[4-6, 37] Three  
28  
29 existing Cochrane reviews have individually examined the efficacy of school-based tobacco, alcohol  
30  
31 and illicit drug use programs.[4-6] Such reviews have not reported outcomes for universal resilience-  
32  
33 based interventions specifically, but have included such interventions in broader categories of  
34  
35 intervention type for subgroup analysis. As a consequence, a systematic review of the efficacy of  
36  
37 universal resilience-based interventions specifically remains unreported. For example a tobacco-  
38  
39 focused review which included any intervention type, classified interventions with a component of  
40  
41 resilience content into different subgroups such as social competence or social influence interventions,  
42  
43 finding evidence for both broad intervention approaches.[6] For the alcohol-focused review, only  
44  
45 universal interventions were included with such interventions grouped according to whether they  
46  
47 targeted alcohol alone or targeted multiple substance types.[5] Whilst meta-analysis was not  
48  
49 conducted due to the heterogeneity of studies, the review concluded that some psychosocial and  
50  
51 developmental prevention programs were effective. Given such inability to draw conclusions with  
52  
53 respect to universal resilience interventions and studies suggest an association exists between  
54  
55 resilience and substance use, there is a need to examine whether more specifically defined universal  
56  
57 resilience interventions are efficacious in reducing substance use by adolescents. Such a review would  
58  
59  
60

1  
2  
3 also provide an update to the existing Cochrane reviews which do not represent the current state of  
4  
5 knowledge as searches are between two and ten years old.  
6  
7

## 8 9 10 **Objective**

11 To determine if universal school-based interventions designed to enhance resilience are efficacious  
12  
13 relative to a comparison group in reducing the extent of adolescent tobacco, alcohol or illicit drug use.  
14  
15

## 16 17 18 **METHODS**

19 All methods employed in the review will be consistent with the Cochrane Handbook for Systematic  
20  
21 Reviews of Interventions.[38]  
22  
23

### 24 25 26 **Eligibility criteria**

27 Study characteristics

#### 28 29 30 *Participants*

31 Studies will be included if they report results of participants aged 5 to 18 years. Studies that select  
32  
33 participants based on a diagnosis of a psychiatric or other mental illness, cognitive or developmental  
34  
35 disability will be excluded from the study. There will be no exclusions on the basis of study country.  
36  
37

#### 38 39 40 *Study design*

41 Studies with the following designs will be included: randomised controlled trials including cluster  
42  
43 randomised controlled trials; staggered enrolment trials [39] or stepped wedged trials [40]; quasi-  
44  
45 randomised trials where group allocation is not purely random [41, 42]; quasi experimental trials  
46  
47 including, non-randomised pre-post [43], time series/interrupted time-series trials including multiple  
48  
49 baseline trials with independent control groups [39, 43], preference trials [40] and regression  
50  
51 discontinuity trials [39]; and natural experiment studies.[44] Trials with non-random assignment of  
52  
53 groups will be included given Medical Research Council recommendations that non-randomised  
54  
55 designs may represent the most appropriate evaluation design for some complex public health  
56  
57  
58  
59  
60

1  
2  
3 interventions,[45] and as an acknowledgment of the value of non-randomised designs in assessing  
4  
5 intervention effects in public health interventions.[46] Studies with a length of follow-up of at least 6  
6  
7 months post intervention commencement will be included in the review. Studies will be excluded if  
8  
9 they do not include a parallel comparison group.  
10

### 11 12 13 *Comparison group*

14 The comparison group may have received no intervention, usual practice, attention only or an  
15  
16 alternate intervention.  
17  
18

### 19 20 21 *Primary outcomes*

22 Studies will be included if they report one or more of the following outcomes:

- 23 - tobacco use (including but not limited to proportion ever smoked, frequency of smoking, number of  
24  
25 cigarettes smoked, tobacco use in last week, current smoking status, or established tobacco use);  
26  
27
- 28 - alcohol consumption (including but not limited to proportion ever consumed an alcoholic drink,  
29  
30 alcohol use in last week, frequency of alcohol consumption, binge drinking, or established alcohol  
31  
32 use);  
33  
34
- 35 - illicit drug use (including but not limited to ever use or frequency of use of any illicit drug or a  
36  
37 specific drug for example cannabis, amphetamines, or cocaine).  
38  
39

40  
41 Substance use data collected via various methods will be included, for example data collected via  
42  
43 observation; self-report via face to face or telephone, internet survey; secondary report by peers or  
44  
45 parents; and biochemical measurement of substance use (such as carbon monoxide or cotinine  
46  
47 detection).  
48

### 49 50 51 *Secondary outcomes*

52 Any adverse outcomes reported in included studies will be described in the results.  
53  
54

### 55 56 57 *Interventions*

1  
2  
3 A study will be included if it reports a universal intervention that specifically aims to improve at least  
4 one internal and at least one external resilience factor. A universal intervention is defined as an  
5 intervention delivered to an entire school population. As the internal and external factors that  
6 comprise resilience are not consistently reported, numerous bodies of work were reviewed to identify  
7 an inclusive list of internal and external resilience factors.[9, 10, 12, 13, 18] Internal resilience factors  
8 will include: cooperation and communication, self-efficacy, self-esteem, empathy, problem solving,  
9 decision-making skills, autonomy, self-awareness, goals and aspirations, social and emotional skills or  
10 competence, and self-control or self-regulation [9, 10, 12, 13, 18, 47-49] . External resilience factors  
11 will include: meaningful participation, high adult expectations, caring relationships and support within  
12 home, school and community environments; peer caring relationships and pro-social peers.[9, 10, 12,  
13 18, 47-49]

14  
15  
16  
17  
18  
19  
20  
21  
22  
23  
24  
25  
26  
27 Given the theoretical and componentry cross over between resilience and other intervention  
28 approaches (such as strengths-based, social competence, social influence, skills focused, affective  
29 focused, social and emotional learning/wellbeing, mental wellbeing, and psycho-social [50-53]), a  
30 study will be included irrespective of the stated overall intervention approach if it specifically aims to  
31 address at least one internal and one external resilience factor as defined above. Studies will be  
32 included irrespective of whether substance use is the primary outcome measure.  
33  
34  
35  
36  
37  
38  
39  
40  
41  
42  
43

44 There will be no exclusion criteria regarding other intervention elements, the duration of intervention,  
45 the format of intervention delivery (for example curricula-based or internet-based), or the intervention  
46 administration (for example the intervention could be delivered by school-staff, research staff,  
47 community members or students).  
48  
49  
50

#### 51 *Setting*

52 Studies will be included if the intervention is implemented across a whole school.  
53  
54  
55  
56  
57  
58  
59  
60

1  
2  
3 Publication characteristics

4 Studies of any language will be included and translated using Google translate where required.

5  
6 Studies published in the last 20 years in peer reviewed journals will be eligible for inclusion.  
7  
8  
9

### 10 **Information sources**

11  
12 Electronic databases

13 The following electronic databases will be searched: Cochrane Central Register of Controlled Trials,  
14  
15 MEDLINE, EMBASE, CINAHL, PsycINFO, ERIC and the first 200 citations only of Google scholar.  
16  
17  
18

19  
20  
21 Other sources

22 The following additional information sources will be searched or contacted for eligible studies:

23  
24 - Hand searching of three relevant journals in the field (last 5 years) (Addiction, Journal of Adolescent  
25  
26 Health, Journal of School Health);  
27

28  
29 - Reference lists of included studies;  
30

31 - Reference lists of existing Cochrane reviews on school-based interventions targeting tobacco,  
32  
33 alcohol and illicit substances;[4-6]  
34

35 - Corresponding authors of included studies;  
36

37 - PubMed single citation searcher.  
38  
39  
40

### 41 **Search strategy**

42 The search strategy will include terms for participants, setting, intervention, study design[54] and  
43  
44 outcome (sourced from current Cochrane systematic reviews examining the effectiveness of tobacco,  
45  
46 alcohol and illicit substance use interventions; see Web Only Appendix 1 for Medline search  
47  
48 strategy).[4-6] The search strategy will be tailored as required for implementation in other information  
49  
50 sources.  
51  
52  
53  
54

### 55 **Study selection**

56  
57  
58  
59  
60

1  
2  
3 Two reviewers will independently screen the titles and abstracts of all studies identified via the  
4 implementation of the above search strategy. The reviewers will not be blind to study authors. A  
5 standardised screening tool will be used to assess study eligibility with those titles and abstracts not  
6 meeting the criteria excluded from the review (see Web Only Appendix 2). The full texts of the  
7 remaining papers will be sourced and examined independently by the two reviewers to assess study  
8 eligibility. Any disagreement between the two reviewers regarding study eligibility, that cannot be  
9 resolved via consensus, will be assessed by a third reviewer. Corresponding authors will be contacted  
10 if there is not sufficient information to determine eligibility. If sufficient information remains  
11 unavailable, the study will be deemed ineligible. The details of ineligible studies for which the full  
12 text was sourced will be reported in the results section including the reason the study was ineligible.  
13  
14  
15  
16  
17  
18  
19  
20  
21  
22  
23

#### 24 25 **Data extraction**

26  
27 The two study reviewers will independently extract data from the eligible studies using a standardised  
28 form. Reviewers will not be blind to study authors. Any unresolved discrepancies between reviewers  
29 regarding the extracted data will be resolved by the third reviewer. Where there is insufficient data to  
30 make a judgement regarding eligibility, the corresponding authors will be contacted for clarification.  
31  
32  
33  
34  
35  
36

37 The following information will be extracted from eligible studies where available: authors, year of  
38 publication, year/s of study, country, study design, intervention (including resilience factors targeted,  
39 duration, intensity), comparison group type, substance use targeted, measurement tool characteristics,  
40 study participants' demographics (including age and gender), study results (including sample size,  
41 consent rate/s, participation rate/s, length of follow up, attrition, relevant outcome results and intra-  
42 class correlation), intervention fidelity (including any process measures) and information to determine  
43 any potential study bias (see below).  
44  
45  
46  
47  
48  
49  
50  
51  
52

#### 53 **Assessment of risk of bias**

54  
55 Study bias of eligible studies will be assessed independently by the two reviewers against the  
56 Cochrane Handbook for Systematic Reviews of Interventions study characteristics including:  
57  
58  
59  
60

1  
2  
3 sequence generation (selection bias), allocation sequence concealment (selection bias), blinding of  
4  
5 participants and personnel (performance bias), blinding of outcome assessment (detection bias),  
6  
7 incomplete outcome data (attrition bias), selective outcome reporting (reporting bias) and other  
8  
9 potential sources of bias.[38]  
10

11  
12  
13 Included non-RCTs will be assessed for selection bias that may have resulted in confounding of the  
14  
15 outcome of interest using the Newcastle-Ottawa Scale,[38] and where possible statistical methods will  
16  
17 adjust for such confounding. Any additional biases specific to individual study designs will be  
18  
19 assessed by the reviewers and reported.[38]  
20

21  
22  
23 The reviewers will not be blinded to the names of the authors, institutions, journal or results of  
24  
25 studies. Any disagreement between the two reviewers regarding study bias that is not resolved via  
26  
27 discussion will be resolved by a third reviewer.  
28  
29

### 30 31 **Data analysis**

32  
33 Data synthesis and analysis

34  
35 Attempts will be made to quantify trial effects from randomised controlled trials by meta-analysis  
36  
37 using data from intention to treat analyses. Where multiple measures (for example biochemical and  
38  
39 self-reported smoking status) for the same outcome are reported, the most objective measure of  
40  
41 outcome will be used. Similarly, where studies report data from multiple follow-up periods, data from  
42  
43 final follow up periods will be extracted. Binary outcomes, (such as tobacco use) will be pooled and  
44  
45 effect size reported using odds ratios. For continuous data, the effect size of trials will be reported  
46  
47 using a mean difference where trial outcomes are reported using a consistent measure, or a  
48  
49 standardised mean difference where outcomes across trials report the same outcome using comparable  
50  
51 measures. Sensitivity analysis will be conducted excluding trials judged to be at high risk of bias.  
52  
53 Meta-analyses will be performed using a random effects model, when there is little evidence of  
54  
55 heterogeneity ( $I^2 < 50\%$ ) and only for randomised trials. Otherwise trial outcomes, including those  
56  
57 from non-randomised trials, will be described narratively.  
58  
59  
60

### Assessment of study heterogeneity

Study heterogeneity will be assessed via examination of forest plots and calculation of  $I^2$  statistic. If an  $I^2$  score over 50% is found, the cause of the heterogeneity will be explored via the conduct of subgroup analyses and sensitivity analysis via meta-regression.

### Issues of clustering

If any included cluster randomised controlled trials have not accounted for clustering, intra-class correlations will be requested from authors or if not available, estimates from similar studies (defined as those with similar school and student characteristics including gender and scholastic year proportions) will be used to adjust for clustering.

### Dealing with missing data

Authors of included studies will be contacted to provide any missing data (for example missing participant data due to drop out or missing statistics such as standard deviations). If not available, attempts will be made to compute them, including an intention-to-treat analysis where appropriate.

### Assessment of reporting bias

Possible reporting bias will be determined by examining funnel plots of the included studies and comparison with trial registers.

### Additional analyses

If possible, additional analyses will be conducted by subgroup (e.g. gender), intervention intensity, intervention duration and length of follow up. Further subgroup analysis is planned based on whether included interventions focused solely on resilience (resilience interventions) versus interventions that focused on resilience as well as other determinants of substance use (multi-dimensional interventions).



## ETHICS AND DISSEMINATION

Given this is a systematic review, ethics approval is not required. Findings of this review will be disseminated via peer-reviewed journals and conference presentations.

## DISCUSSION

This systematic review will be the first internationally to examine the effectiveness of universal school-based resilience interventions in reducing the prevalence of adolescent tobacco, alcohol and illicit drug use. Given the majority of adolescents attend school, population level implementation of an effective intervention approach has the potential to provide significant health gains by reducing adolescent substance use, and as a result will be of interest to researchers and policy makers.

**AUTHORS' CONTRIBUTIONS**

RH led the drafting of the protocol and will lead the review. All authors contributed to the refinement of the review protocol, approved the final manuscript and will be involved in the preparation of the review.

**COMPETING INTERESTS STATEMENT**

The authors are currently undertaking a randomised controlled trial of a school-based resilience intervention to decrease adolescent substance use. The authors have not received any benefit, in cash or in kind, any hospitality or any subsidy from the alcohol industry or any other source perceived to have an interest in the outcome of this review.

**FUNDING STATEMENT**

This research received no specific grant from any funding agency in the public, commercial or not-for-profit sectors.

## REFERENCES

1. Begg S, Vos T, Barker B et al. The burden of disease and injury in Australia 2003. 2007. PHE 82, Canberra, AIHW.
2. Lopez AD. Global burden of disease and risk factors. 2006. Washington D.C., Oxford University Press.
3. Gilman SE, Abrams DB, Buka SL. Socioeconomic status over the life course and stages of cigarette use: initiation, regular use, and cessation. *Journal of Epidemiology & Community Health* 2003; **57**(10):802-808.
4. Faggiano F, Vigna-Taglianti FD, Versino E et al. School-based prevention for illicit drugs' use. *Cochrane Database of Systematic Reviews* 2005;(2):CD003020.
5. Foxcroft DR, Tsertsvadze A. Universal school-based prevention programs for alcohol misuse in young people. *Cochrane Database of Systematic Reviews* 2011; **5**:CD009113.
6. Thomas RE, McLellan J, Perera R. School-based programmes for preventing smoking. *Cochrane Database of Systematic Reviews* 2013; **Issue 4**(Art. No.: CD001293. DOI: 10.1002/14651858.CD001293.pub3).
7. Stewart-Brown S. What is the evidence on school health promotion in improving health or preventing disease and, specifically, what is the effectiveness of the health promoting schools approach? 2006. Copenhagen, WHO Regional Office for Europe (Health Evidence Network report).
8. Resnick MD. Resilience and protective factors in the lives of adolescents. *J Adolesc Health* 2000; **27**(1):1-2.
9. Masten AS. Ordinary magic. Resilience processes in development. *Am Psychol* 2001; **56**(3):227-238.
10. Luthar SS, Cicchetti D, Becker B. The construct of resilience: a critical evaluation and guidelines for future work. *Child Dev* 2000; **71**(3):543-562.
11. Greenberg MT, Weissberg RP, O'Brien MU et al. Enhancing school-based prevention and youth development through coordinated social, emotional, and academic learning. *American Psychologist* 58(6-7):466-74, 2003;-Jul.
12. Fergus S, Zimmerman MA. Adolescent resilience: a framework for understanding healthy development in the face of risk. *Annu Rev Public Health* 2005; **26**:399-419.
13. Harvey J, Delfabbro PH. Psychological resilience in disadvantaged youth: A critical overview. *Australian Psychologist* 2004; **39**(1):3-13.
14. Catalano RF, Berglund ML, Ryan JAM et al. Positive Youth Development in the United States: Research Findings on Evaluations of Positive Youth Development Programs. *Ann Am Acad Pol Soc Sci* 2004; **591**(97):124.
15. Greenberg MT. Promoting resilience in children and youth: preventive interventions and their interface with neuroscience. *Ann N Y Acad Sci* 2006; **1094**:139-150.

16. Resnick MD, Bearman PS, Blum RW et al. Protecting adolescents from harm. Findings from the National Longitudinal Study on Adolescent Health. *JAMA* 1997; **278**(10):823-832.
17. Resnick MD. Protective factors, resiliency and healthy youth development. *Adolescent Medicine: State of the Art Reviews* 2000; **11**(1):157-164.
18. Lee TY, Cheung CK, Kwong WM. Resilience as a positive youth development construct: a conceptual review. *Thiscientificworldjournal* 2012; **2012**:390450.
19. Benard B. *Fostering Resiliency in Urban Schools. Closing the achievement gap: A vision for changing beliefs and practices.* Virginia: Association for Supervision and Curriculum Development 1996.
20. Benard B. *Protective factors in the family, school, and community.* Portland, OR: Western Center for Drug-Free Schools and Communities 1991
21. Bernat DH, Resnick MD. Healthy youth development: science and strategies. *Journal of Public Health Management & Practice* 2006; **Suppl**:S10-S16.
22. Toumbourou JW. *Drug Prevention Strategies: A Developmental Settings Approach Prevention Research Evaluation Report Number 2.* 2002. Melbourne, Australian Drug Foundation.
23. MindMatters Evaluation Consortium. *Report of the MindMatters (National Mental Health in Schools Project) Evaluation Project, vols. 1-4.* 2000. Newcastle, Hunter Institute of Mental Health.
24. Bond L, Butler H, Thomas L et al. Social and school connectedness in early secondary school as predictors of late teenage substance use, mental health, and academic outcomes. *J Adolesc Health* 2007; **40**(4):357.e9-357.e18.
25. Carvajal SC, Granillo TM. A prospective test of distal and proximal determinants of smoking initiation in early adolescents. *Addict Behav* 2006; **31**(4):649-660.
26. Fang L, Barnes-Ceeney K, Schinke SP. Substance use behavior among early-adolescent Asian American girls: the impact of psychological and family factors. *Women & Health* 2011; **51**(7):623-642.
27. Haegerich TM, Tolan PH. Core competencies and the prevention of adolescent substance use. *New Directions for Child & Adolescent Development* 2008; **2008**(122):47-60.
28. Hiemstra M, Otten R, Engels RC. Smoking onset and the time-varying effects of self-efficacy, environmental smoking, and smoking-specific parenting by using discrete-time survival analysis. *Journal of Behavioral Medicine* 2012; **35**(2):240-251.
29. Kavas AB. Self-esteem and health-risk behaviors among Turkish late adolescents. *Adolescence* 2009; **44**(173):187-198.
30. McLellan L, Rissel C, Donnelly N et al. Health behaviour and the school environment in New South Wales, Australia. *Social Science & Medicine* 1999; **49**(5):611-619.
31. Neumark-Sztainer D, Story M, French SA et al. Psychosocial correlates of health compromising behaviors among adolescents. *Health Educ Res* 1997; **12**(1):37-52.

- 1
- 2
- 3 32. Patton GC, Bond L, Carlin JB et al. Promoting social inclusion in schools: a group-randomized
- 4 trial of effects on student health risk behavior and well-being. *Am J Public Health* 2006;
- 5 **96(9):1582-1587.**
- 6
- 7 33. Piko BF, Kovacs E. Do parents and school matter? Protective factors for adolescent substance
- 8 use. *Addict Behav* 2010; **35(1):53-56.**
- 9
- 10 34. Vuille JC, Schenkel M. Social equalization in the health of youth. The role of the school.
- 11 *European Journal of Public Health* 2001; **11(3):287-293.**
- 12
- 13 35. Wiefferink CH, Peters L, Hoekstra F et al. Clustering of health-related behaviors and their
- 14 determinants: possible consequences for school health interventions. *Prevention Science* 2006;
- 15 **7(2):127-149.**
- 16
- 17 36. Wright LL, Palfai TP. Life goal appraisal and marijuana use among college students. *Addict*
- 18 *Behav* 2012; **37(7):797-802.**
- 19
- 20 37. Thomas R, Perera R. School-based programmes for preventing smoking. *Cochrane Database of*
- 21 *Systematic Reviews* 2006; **3:CD001293.**
- 22
- 23 38. Higgins JPT, Green S. *Cochrane Handbook for Systematic Reviews of Interventions*. Version
- 24 5.1.0 [updated March 2011]. Higgins JPT, Green S, editors. The Cochrane Collaboration, 2011.
- 25
- 26
- 27 39. Mercer SL, DeVinney BJ, Fine LJ et al. Study designs for effectiveness and translation research
- 28 :identifying trade-offs. *Am J Prev Med* 2007; **33(2):139-154.**
- 29
- 30 40. Medical Research Council. *Developing and evaluating complex interventions: new guidance.*
- 31 2008.
- 32
- 33 41. Battaglia MP, Link MW, Frankel MR et al. An evaluation of respondent selection methods of
- 34 respondent mail surveys. *Public Opinion Quarterly* 2008; **72(3):459-469.**
- 35
- 36 42. Oldendick RW, Bishop GF, Sorenson SB et al. A comparison of the Kish and last birthday
- 37 methods of respondent selection in telephone surveys. *Journal of Official Statistics* 1988;
- 38 **4(4):307-318.**
- 39
- 40 43. Nutbeam D, Bauman A. *Evaluation in a Nutshell: A practice guide to the evaluation of health*
- 41 *promotion programs.* North Ryde, Australia: McGraw-Hill 2006
- 42
- 43 44. Sadish W, Cook T, Campbell D. *Experimental and quasi-experimental designs for generalized*
- 44 *causal inference.* New York: Houghton Mifflin Company 2002
- 45
- 46 45. Craig P, Dieppe P, Macintyre S et al. *Developing and evaluating complex interventions: new*
- 47 *guidance.* 2008. Medical Research Council.
- 48
- 49 46. Armstrong R, Waters E, Jackson N et al. *Guidelines for systematic reviews of health promotion*
- 50 *and public health interventions.* [Version 2]. 2007. Australia, Melbourne University.
- 51
- 52 47. *Measuring protective factors and resilience traits in youth: The healthy kids resilience*
- 53 *assessment.* Seventh Annual Meeting of the Society for Prevention Research; California: School
- 54 *and Community Health Research Group; 1999.*
- 55
- 56 48. Hanson TL, Kim JO. *Measuring resilience and youth development: the psychometric properties*
- 57 *of the Healthy Kids Survey.* 2007. Washington, DC, U.S. Department of Education, Institute of
- 58
- 59
- 60

1  
2  
3 Education Sciences, National Centre for Education Evaluation and Regional Assistance,  
4 Regional Educational Laboratory West.

- 5  
6 49. Masten AS. Resilience in developing systems: Progress and promise as the fourth wave rises.  
7 Development and Psychopathology 2007;(3):921-930.  
8  
9 50. Brownlee K, Rawana J, Franks J et al. A systematic review of strengths and resilience outcome  
10 literature relevant to children and adolescents. Child & Adolescent Social Work Journal  
11 2013;No.  
12  
13 51. Griffin KW, Botvin GJ. Evidence-based interventions for preventing substance use disorders in  
14 adolescents. Child & Adolescent Psychiatric Clinics of North America 2010; 19(3):505-526.  
15  
16 52. Hawkins JD, Catalano RF, Miller JY. Risk and protective factors for alcohol and other drug  
17 problems in adolescence and early adulthood: implications for substance abuse prevention.  
18 Psychol Bull 1992; 112(1):64-105.  
19  
20 53. Petraitis J, Flay BR, Miller TQ. Reviewing theories of adolescent substance use: organizing  
21 pieces in the puzzle. Psychol Bull 1995; 117(1):67-86.  
22  
23 54. Kingsland M, Wiggers J, Wolfenden L. Interventions in sports settings to reduce alcohol  
24 consumption and alcohol-related harm: a systematic review. BMJ Open 2[2], 1-6. 6-4-2012.  
25 United Kingdom, BMJ Group.  
26  
27  
28  
29  
30  
31  
32  
33  
34  
35  
36  
37  
38  
39  
40  
41  
42  
43  
44  
45  
46  
47  
48  
49  
50  
51  
52  
53  
54  
55  
56  
57  
58  
59  
60

1  
2  
3 | **TITLE:** Systematic review of [universal](#) school-based resilience interventions targeting adolescent  
4 tobacco, alcohol or illicit drug use: review protocol

5  
6 **CORRESPONDING AUTHOR:**

7 Rebecca Kate Hodder

8 Departments/Institutions: Hunter New England Population Health, Hunter New England Local Health  
9 District; The University of Newcastle; Hunter Medical Research Institute

10 Address: Hunter New England Population Health, Hunter New England Local Health District, Locked  
11 Bag 10, Wallsend, NSW, 2287, Australia.

12 Email: [Rebecca.hodder@hnehealth.nsw.gov.au](mailto:Rebecca.hodder@hnehealth.nsw.gov.au);

13 Telephone: +61 2 4924 6499;

14 Fax: +61 2 4924 6215

15  
16 **CO-AUTHORS:**

17 **Megan Freund**

18 *Departments/Institutions:* The University of Newcastle, Hunter New England Population Health,  
19 Hunter Medical Research Institute

20 *Address:* Hunter New England Population Health, Hunter New England Local Health District, Locked  
21 Bag 10, Wallsend, NSW, 2287, Australia.

22  
23 **Luke Wolfenden**

24 *Departments/Institutions:* The University of Newcastle, Hunter Medical Research Institute

25 *Address:* C/-Hunter New England Population Health, Hunter New England Local Health District,  
26 Locked Bag 10, Wallsend, NSW, 2287, Australia.

27  
28 **Jenny Bowman**

29 *Departments/Institutions:* The University of Newcastle

30 *Address:* The University of Newcastle, University Drive, Callaghan, NSW, 2308, Australia.

31  
32 **Karen Gillham**

33 *Departments/Institutions:* Hunter New England Population Health, Hunter Medical Research Institute

34 *Address:* Hunter New England Population Health, Hunter New England Local Health District, Locked  
35 Bag 10, Wallsend, NSW, 2287, Australia.

36  
37 **Julia Dray**

38 *Departments/Institutions:* The University of Newcastle, Hunter New England Population Health,  
39 Hunter Medical Research Institute

40 *Address:* Hunter New England Population Health, Hunter New England Local Health District, Locked  
41 Bag 10, Wallsend, NSW, 2287, Australia.

42  
43 **John Wiggers**

44 *Departments/Institutions:* School of Medicine and Public Health, University of Newcastle; Hunter  
45 New England Population Health, Hunter Medical Research Institute

46 *Address:* Locked Bag 10, Wallsend, NSW, 2287, Australia.

47  
48  
49 **Key words:** smoking; alcohol drinking; marijuana smoking; resilience, psychological; schools

50  
51 | **Word count:** [2,0062,493](#)

## ABSTRACT

**Introduction:** Tobacco, alcohol and illicit drug use contribute significantly to global rates of morbidity and mortality. Despite evidence suggesting interventions designed to increase adolescent resilience may represent a means of reducing adolescent substance use, and schools providing a key opportunity to implement such interventions, existing systematic reviews assessing the effectiveness of school-based interventions targeting adolescent substance use have not examined this potential.

**Methods and analysis:** The aim of the systematic review is to determine whether [universal](#) interventions focused on enhancing the resilience of adolescents are effective in reducing adolescent substance use. Eligible studies will: include participants [5-18](#) years of age ~~or under~~; report tobacco use, alcohol consumption or illicit drug use as outcomes; and implement a school-based intervention designed to promote [both](#) internal (e.g. self-esteem) and external (e.g. school connectedness) resilience factors. Eligible study designs include randomised controlled trials, cluster randomised controlled trials, staggered enrolment trials, stepped wedged trials, quasi-randomised trials, quasi experimental trials, time series/interrupted time-series trials, preference trials, regression discontinuity trials and natural experiment studies with a parallel control group. A search strategy including criteria for participants, study design, outcome, setting and intervention will be implemented in various electronic databases and information sources. Two reviewers will independently screen studies to assess eligibility, as well as extract data from, and assess risk of bias of, included studies. A third reviewer will resolve any discrepancies. Attempts will be made to quantify trial effects by meta-analysis. Binary outcomes will be pooled and effect size reported using odds ratios. For continuous data, effect size of trials will be reported using a mean difference where trial outcomes report the same outcome using a consistent measure, or standardised mean difference where trials report a comparable measure. Otherwise trial outcomes will be described narratively.

**Dissemination:** Review findings will be disseminated via peer-reviewed journals and conferences.



## INTRODUCTION

Tobacco, alcohol and illicit drug use contribute significantly to global rates of morbidity and mortality.[1, 2] School-based interventions have been recommended to be implemented to reduce this burden given initiation of such drug use typically occurs during adolescence,[3] and schools provide almost universal access to adolescents for prolonged periods. Given this, school-based interventions have been implemented by governments internationally in an attempt to reduce adolescent initiation to substance use.[4-6]

Despite widespread implementation, Cochrane reviews have found little evidence for the effectiveness of school-based drug prevention programs on adolescent substance use, [with such reviews focused on any or only universal intervention approaches](#). [4-6] Of the multiple intervention approaches examined by such reviews, little or no evidence of effectiveness has been found for the most commonly implemented curricula or information-only interventions. [Some evidence however has been found for various psychosocial interventions, including those that adopt a social competence and social influence](#), generic psychosocial or individual social skills approach.[4-6] A review by the World Health Organisation examining school-based drug prevention programs similarly concluded that programs that promote young people's mental wellbeing were most likely to be effective, suggesting that interventions incorporating a mental wellbeing approach may have the best chance of impacting on substance use.[7]

The concept of resilience and closely related research regarding protective factors provides one avenue for addressing mental wellbeing that is suggested to have an impact on adolescent substance use.[8-17] [Resilience has been variably defined as the process of, capacity for, or outcomes of successful adaptation in the context of risk or adversity](#). [9, 10, 12, 13, 18] [Despite this variability, it is generally agreed that a range of](#) both individual and environmental protective factors are thought to contribute to an individual's resilience; be critical for positive youth development; and protect

1  
2  
3 adolescents from engaging in risk behaviours, such as substance use.[19-22] Individual, or internal  
4  
5 resilience factors refer to the personal skills and traits of young people (including self-esteem,  
6  
7 empathy, and self-awareness).[23] Environmental, or external resilience factors refer to the positive  
8  
9 influences within a young person's social environment (including connectedness to family, school and  
10  
11 community).[23] Various studies have separately reported such factors to be negatively associated  
12  
13 with adolescent use of different types of substances—use, [12, 16, 24-36] for example higher self-  
14  
15 esteem [16, 29, 32, 35] associated with a lower likelihood of tobacco and with lower likelihood of  
16  
17 alcohol use.

18  
19  
20  
21  
22  
23 Despite this associative evidence, ~~and the systematic review evidence for conceptually overlapping~~  
24 ~~intervention approaches such individual social skills~~, to the authors knowledge existing systematic  
25  
26 reviews assessing the effectiveness of school-based substance use interventions have not reported the  
27  
28 effectiveness of universal resilience-based interventions on adolescent use of multiple substances. ~~is~~  
29 ~~potential specifically~~.[4-6, 37] Three existing Cochrane reviews have individually examined the  
30 efficacy of school-based tobacco, alcohol and illicit drug use programs.[4-6]. Such reviews have not  
31 reported outcomes for universal resilience-based interventions specifically, but have included such  
32 interventions in broader categories of intervention type for subgroup analysis. As a consequence, a  
33 systematic review of the efficacy of universal resilience-based interventions specifically remains  
34 unreported. For example a tobacco-focused review which included any intervention type, classified  
35 interventions with a component of resilience content —into different subgroups such as social  
36 competence or social influence interventions, finding evidence for both broad intervention  
37 approaches.[6]. For the alcohol-focused review, only universal interventions were included with such  
38 interventions grouped according to whether they targeted alcohol alone or targeted multiple substance  
39 types.[5] Whilst meta-analysis was not conducted due to the heterogeneity of studies, the review  
40 concluded that some psychosocial and developmental prevention programs were effective. Given such  
41 inability to draw conclusions with respect to universal resilience interventions and studies suggest an  
42 association exists between resilience and substance use, there is a need to examine whether more  
43  
44  
45  
46  
47  
48  
49  
50  
51  
52  
53  
54  
55  
56  
57  
58  
59  
60

1  
2  
3 [specifically defined universal resilience interventions are efficacious in reducing substance use by](#)  
4 [adolescents. Such a review would also provide an update to the existing Cochrane reviews which do](#)  
5 [not represent the current state of knowledge as searches are between two and ten years old.](#)  
6  
7  
8  
9

## 10 11 12 **Objective**

13  
14 To determine if [universal](#) school-based interventions designed to enhance resilience are [effective](#)  
15 [efficacious](#) relative to a comparison group in reducing the extent of adolescent tobacco, alcohol or  
16 illicit drug use.  
17  
18  
19

## 20 21 22 **METHODS**

23  
24 All methods employed in the review will be consistent with the Cochrane Handbook for Systematic  
25 Reviews of Interventions.[38]  
26  
27  
28  
29

## 30 31 **Eligibility criteria**

32 Study characteristics

### 33 *Participants*

34  
35  
36 Studies will be included if they report results of participants aged [5 to](#) 18 years ~~or under~~. Studies that  
37 select participants based on a diagnosis of a psychiatric or other mental illness, cognitive or  
38 developmental disability will be excluded from the study. There will be no exclusions on the basis of  
39 study country.  
40  
41  
42  
43  
44

### 45 *Study design*

46  
47  
48 Studies with the following designs will be included: randomised controlled trials including cluster  
49 randomised controlled trials; staggered enrolment trials [39]\_or stepped wedged trials [40]; quasi-  
50 randomised [trials where group allocation is not purely random](#) [41, 42]; quasi experimental [trials](#)  
51 [including](#), non-randomised pre-post [43], time series/interrupted time-series trials including multiple  
52 baseline trials with independent control groups [39, 43], preference trials [40]\_and regression  
53  
54  
55  
56  
57  
58  
59  
60

1  
2  
3 discontinuity trials [39]; [and natural experiment studies](#).<sup>[44]</sup> Trials with non-random assignment of  
4 groups will be included given Medical Research Council recommendations that non-randomised  
5 designs may represent the most appropriate evaluation design for some complex public health  
6 interventions,<sup>[45]</sup> and as an acknowledgment of the value of non-randomised designs in assessing  
7 intervention effects in public health interventions.<sup>[46]</sup> Studies with a ~~any~~ length of follow-up [of at least](#)  
8 [6 months post intervention commencement](#) will be included in the review. Studies will be excluded if  
9 they do not include a parallel comparison group.  
10  
11  
12  
13  
14  
15  
16  
17  
18  
19

### *Comparison group*

20 The comparison group may have received no intervention, usual practice, attention only or an  
21 alternate intervention.  
22  
23  
24  
25  
26

### *Primary outcomes*

27 Studies will be included if they report one or more of the following outcomes:  
28  
29  
30

- 31 - tobacco use (including [but not limited to proportion](#) ever smoked, [frequency of smoking, number of](#)  
32 [cigarettes smoked](#), tobacco use in last week, ~~or~~ current smoking status, [or established tobacco use](#));  
33  
34
- 35 - alcohol consumption (including [but not limited to proportion](#) ever consumed an alcoholic drink,  
36 alcohol use in last week, frequency of alcohol consumption, [binge drinking, or established alcohol](#)  
37 [use](#));  
38  
39
- 40 - illicit drug use (including [but not limited to](#) ever use or frequency of use of [any illicit drug or a](#)  
41 [specific drug for example](#) cannabis, amphetamines, [or](#) cocaine).  
42  
43  
44  
45  
46  
47

48 Substance use data collected via various methods will be included, for example data collected via  
49 observation; self-report via face to face or telephone, internet survey; secondary report by peers or  
50 parents; and biochemical measurement of substance use (such as carbon monoxide or cotinine  
51 detection).  
52  
53  
54  
55  
56  
57

### *Secondary outcomes*

Any adverse outcomes reported in included studies will be described in the results.

### *Interventions*

A study will be included if it reports a universal intervention that specifically aims to improve at least one internal and at least one external resilience factor. A universal intervention is defined as an intervention delivered to an entire school population. As the internal and external factors that comprise resilience are not consistently reported, numerous bodies of work were reviewed to identify an inclusive list of internal and external resilience factors.[9, 10, 12, 13, 18] Internal resilience factors will include: cooperation and communication, self-efficacy, self-esteem, empathy, problem solving, decision-making skills, autonomy, self-awareness, goals and aspirations, social and emotional skills or competence, and self-control or self-regulation [9, 10, 12, 13, 18, 47-49] . External resilience factors will include: meaningful participation, high adult expectations, caring relationships and support within home, school and community environments; peer caring relationships and pro-social peers.[9, 10, 12, 18, 47-49]

Given the theoretical and componentry cross over between resilience and other intervention approaches (such as strengths-based, social competence, social influence, skills focused, affective focused, social and emotional learning/wellbeing, mental wellbeing, and psycho-social [50-53]), a study will be included irrespective of the stated overall intervention approach if it specifically aims to address at least one internal and one external resilience factor as defined above. Studies will be included irrespective of whether substance use is the primary outcome measure.

~~Studies will be included if they report interventions that address student resilience in some way, irrespective of whether substance use is the primary outcome measure of the study. A broad definition of resilience will be employed to identify eligible studies, with a study included if it reports an intervention based on resilience or any known internal or external resilience factor (including internal resilience factors: cooperation and communication, self efficacy, empathy, problem solving, self-awareness, goals and aspirations; and/or external resilience factors: school support, school meaningful~~

~~participation, community support, community meaningful participation, home support, home meaningful participation, peer caring relationships, and pro-social peers).[46] Interventions described as strengths based, social and emotional learning/wellbeing, mental wellbeing, psycho-social wellbeing, and mental health will be included in the review if they address an internal or external resilience factor. Studies will be assessed to determine whether they are: entirely focused on resilience and address both internal and external resilience (comprehensive); entirely focused on one such type of factor (uni-dimensional); or a component of the intervention is focused on a small number of such factors (partial).~~

There will be no exclusion criteria regarding other intervention elements, the duration of intervention, the format of intervention delivery (for example curricula-based or internet-based), or the intervention administration (for example the intervention could be delivered by school-staff, research staff, community members or students).

### *Setting*

Studies will be included if the intervention is implemented ~~in~~ across a whole school.

### Publication characteristics

Studies of any language will be included and translated using Google translate where required.

Studies published in the last 20 years in peer reviewed journals will be eligible for inclusion.

### **Information sources**

#### Electronic databases

The following electronic databases will be searched: Cochrane Central Register of Controlled Trials, MEDLINE, EMBASE, CINAHL, PsycINFO, ERIC and the first 200 citations only of Google scholar.

#### Other sources

The following additional information sources will be searched or contacted for eligible studies:

- Hand searching of three relevant journals in the field (last 5 years) (Addiction, Journal of Adolescent Health, Journal of School Health);
- Reference lists of included studies;
- Reference lists of existing Cochrane reviews on school-based interventions targeting tobacco, alcohol and illicit substances;<sup>[4-6]</sup>
- Corresponding authors of included studies;
- [PubMed single citation searcher](#);

### Search strategy

The search strategy will include terms for participants, setting, intervention, study design<sup>[54]</sup> and outcome (sourced from current Cochrane systematic reviews examining the effectiveness of tobacco, alcohol and illicit substance use interventions; see Web Only Appendix 1 for Medline search strategy).<sup>[4-6]</sup> The search strategy will be tailored as required for implementation in other information sources.

### Study selection

Two reviewers will independently screen the titles and abstracts of all studies identified via the implementation of the above search strategy. The reviewers will not be blind to study authors. A standardised screening tool will be used to assess study eligibility with those titles and abstracts not meeting the criteria excluded from the review ([see Web Only Appendix 2](#)). The full texts of the remaining papers will be sourced and examined independently by the two reviewers to assess study eligibility. Any disagreement between the two reviewers regarding study eligibility, that cannot be resolved via consensus, will be assessed by a third reviewer. Corresponding authors will be contacted if there is not sufficient information to determine eligibility. If sufficient information remains unavailable, the study will be deemed ineligible. The details of ineligible studies for which the full text was sourced will be reported in the results section including the reason the study was ineligible.

### Data extraction

1  
2  
3 The two study reviewers will independently extract data from the eligible studies using a standardised  
4 form. Reviewers will not be blind to study authors. Any unresolved discrepancies between reviewers  
5 regarding the extracted data will be resolved by the third reviewer. Where there is insufficient data to  
6 make a judgement regarding eligibility, the corresponding authors will be contacted for clarification.  
7  
8  
9

10  
11  
12  
13 The following information will be extracted from eligible studies where available: authors, year of  
14 publication, year/s of study, country, study design, intervention (including resilience factors targeted,  
15 duration, intensity), comparison group type, substance use targeted, measurement tool characteristics,  
16 study participants' demographics (including age and gender), study results (including sample size,  
17 consent rate/s, participation rate/s, length of follow up, attrition, relevant outcome results and intra-  
18 class correlation), intervention fidelity (including any process measures) and information to determine  
19 any potential study bias (see below).  
20  
21  
22  
23  
24  
25  
26  
27  
28

### 29 **Assessment of risk of bias**

30  
31 Study bias of eligible studies will be assessed independently by the two reviewers against the  
32 Cochrane Handbook for Systematic Reviews of Interventions study characteristics including:  
33 sequence generation (selection bias), allocation sequence concealment (selection bias), blinding of  
34 participants and personnel (performance bias), blinding of outcome assessment (detection bias),  
35 incomplete outcome data (attrition bias), selective outcome reporting (reporting bias) and other  
36 potential sources of bias.[38]  
37  
38  
39  
40  
41  
42  
43  
44  
45

46 Included non-RCTs will be assessed for selection bias that may have resulted in confounding of the  
47 outcome of interest [using the Newcastle-Ottawa Scale](#).<sup>[38]</sup> and where possible statistical methods will  
48 adjust for such confounding. Any additional biases specific to individual study designs will be  
49 assessed by the reviewers and reported.<sup>[38]</sup>  
50  
51  
52  
53  
54  
55  
56  
57  
58  
59  
60



1  
2  
3 The reviewers will not be blinded to the names of the authors, institutions, journal or results of  
4 studies. Any disagreement between the two reviewers regarding study bias that is not resolved via  
5 discussion will be resolved by a third reviewer.  
6  
7  
8  
9

## 10 11 **Data analysis**

### 12 Data synthesis and analysis

13  
14 Attempts will be made to quantify trial effects [from randomised controlled trials](#) by meta-analysis  
15 using data from intention to treat analyses. Where multiple measures (for example biochemical and  
16 self-reported smoking status) for the same outcome are reported, the most objective measure of  
17 outcome will be used. Similarly, where studies report data from multiple follow-up periods, data from  
18 final follow up periods will be extracted. Binary outcomes, (such as tobacco use) will be pooled and  
19 effect size reported using odds ratios. For continuous data, the effect size of trials will be reported  
20 using a mean difference where trial outcomes are reported using a consistent measure, or a  
21 standardised mean difference where outcomes across trials report the same outcome using comparable  
22 measures. Sensitivity analysis will be conducted excluding trials judged to be at high risk of bias.  
23  
24 Meta-analyses will be performed using a random effects model, when there is little evidence of  
25 heterogeneity ( $I^2 < 50\%$ ) and only for randomised trials. Otherwise trial outcomes, [including those](#)  
26 [from non-randomised trials](#), will be described narratively.  
27  
28  
29  
30  
31  
32  
33  
34  
35  
36  
37  
38  
39  
40

### 41 Assessment of study heterogeneity

42  
43 Study heterogeneity will be assessed via examination of forest plots and calculation of  $I^2$  statistic. If  
44 an  $I^2$  score over 50% is found, the cause of the heterogeneity will be explored via the conduct of  
45 subgroup analyses [and sensitivity analysis via meta-regression](#).  
46  
47  
48  
49  
50

### 51 Issues of clustering

52  
53 If any included cluster randomised controlled trials have not accounted for clustering, intra-class  
54 correlations will be requested from authors or if not available, estimates from similar studies [\(defined](#)  
55  
56  
57  
58  
59  
60

1  
2  
3 [as those with similar school and student characteristics including gender and scholastic year](#)  
4  
5 [proportions](#)) will be used to adjust for clustering.  
6  
7

#### 8 9 [Dealing with missing data](#)

10 [Authors of included studies will be contacted to provide any missing data \(for example missing](#)  
11 [participant data due to drop out or missing statistics such as standard deviations\). If not available,](#)  
12 [attempts will be made to compute them, including an intention-to-treat analysis where appropriate.](#)  
13  
14  
15  
16

#### 17 18 19 Assessment of reporting bias

20  
21 Possible reporting bias will be determined by examining funnel plots of the included studies and  
22  
23 comparison with trial registers.  
24  
25

#### 26 27 Additional analyses

28  
29 If possible, additional analyses will be conducted by subgroup (e.g. gender), intervention intensity,  
30  
31 intervention duration and length of follow up. [Further subgroup analysis is planned based on whether](#)  
32 [included interventions focused solely on resilience \(resilience interventions\) versus interventions that](#)  
33 [focused on resilience as well as other determinants of substance use \(multi-dimensional](#)  
34 [interventions\).](#)  
35  
36  
37  
38  
39  
40  
41

## 42 **ETHICS AND DISSEMINATION**

43  
44 Given this is a systematic review, ethics approval is not required. Findings of this review will be  
45  
46 disseminated via peer-reviewed journals and conference presentations.  
47  
48

## 49 **DISCUSSION**

50  
51  
52 This systematic review will be the first internationally to examine the effectiveness of [universal](#)  
53  
54 school-based resilience interventions in reducing the prevalence of adolescent tobacco, alcohol and  
55  
56 illicit drug use. Given the majority of adolescents attend school, population level implementation of  
57  
58  
59  
60

1  
2  
3 an effective intervention approach has the potential to provide significant health gains by reducing  
4 adolescent substance use, and as a result will be of interest to researchers and policy makers.  
5  
6  
7  
8

#### 9 10 **AUTHORS' CONTRIBUTIONS**

11 RH led the drafting of the protocol and will lead the review. All authors contributed to the refinement  
12 of the review protocol, approved the final manuscript and will be involved in the preparation of the  
13 review.  
14  
15  
16  
17  
18  
19  
20

#### 21 **COMPETING INTERESTS STATEMENT**

22 The authors are currently undertaking a randomised controlled trial of a school-based resilience  
23 intervention to decrease adolescent substance use. The authors have not received any benefit, in cash  
24 or in kind, any hospitality or any subsidy from the alcohol industry or any other source perceived to  
25 have an interest in the outcome of this review.  
26  
27  
28  
29  
30  
31  
32  
33  
34  
35

#### 36 **FUNDING STATEMENT**

37 This research received no specific grant from any funding agency in the public, commercial or not-  
38 for-profit sectors.  
39  
40  
41  
42  
43  
44  
45  
46  
47  
48  
49  
50  
51  
52  
53  
54  
55  
56  
57  
58  
59  
60

## REFERENCES

1. Begg S, Vos T, Barker B et al. The burden of disease and injury in Australia 2003. 2007. PHE 82, Canberra, AIHW.
2. Lopez AD. Global burden of disease and risk factors. 2006. Washington D.C., Oxford University Press.
3. Gilman SE, Abrams DB, Buka SL. Socioeconomic status over the life course and stages of cigarette use: initiation, regular use, and cessation. *Journal of Epidemiology & Community Health* 2003; **57**(10):802-808.
4. Faggiano F, Vigna-Taglianti FD, Versino E et al. School-based prevention for illicit drugs' use. *Cochrane Database of Systematic Reviews* 2005;(2):CD003020.
5. Foxcroft DR, Tsertsvadze A. Universal school-based prevention programs for alcohol misuse in young people. *Cochrane Database of Systematic Reviews* 2011; **5**:CD009113.
6. Thomas RE, McLellan J, Perera R. School-based programmes for preventing smoking. *Cochrane Database of Systematic Reviews* 2013; **Issue 4**(Art. No.: CD001293. DOI: 10.1002/14651858.CD001293.pub3).
7. Stewart-Brown S. What is the evidence on school health promotion in improving health or preventing disease and, specifically, what is the effectiveness of the health promoting schools approach? 2006. Copenhagen, WHO Regional Office for Europe (Health Evidence Network report).
8. Resnick MD. Resilience and protective factors in the lives of adolescents. *J Adolesc Health* 2000; **27**(1):1-2.
9. Masten AS. Ordinary magic. Resilience processes in development. *Am Psychol* 2001; **56**(3):227-238.
10. Luthar SS, Cicchetti D, Becker B. The construct of resilience: a critical evaluation and guidelines for future work. *Child Dev* 2000; **71**(3):543-562.
11. Greenberg MT, Weissberg RP, O'Brien MU et al. Enhancing school-based prevention and youth development through coordinated social, emotional, and academic learning. *American Psychologist* 58(6-7):466-74, 2003;-Jul.
12. Fergus S, Zimmerman MA. Adolescent resilience: a framework for understanding healthy development in the face of risk. *Annu Rev Public Health* 2005; **26**:399-419.
13. Harvey J, Delfabbro PH. Psychological resilience in disadvantaged youth: A critical overview. *Australian Psychologist* 2004; **39**(1):3-13.
14. Catalano RF, Berglund ML, Ryan JAM et al. Positive Youth Development in the United States: Research Findings on Evaluations of Positive Youth Development Programs. *Ann Am Acad Pol Soc Sci* 2004; **591**(97):124.
15. Greenberg MT. Promoting resilience in children and youth: preventive interventions and their interface with neuroscience. *Ann N Y Acad Sci* 2006; **1094**:139-150.

16. Resnick MD, Bearman PS, Blum RW et al. Protecting adolescents from harm. Findings from the National Longitudinal Study on Adolescent Health. *JAMA* 1997; **278**(10):823-832.
17. Resnick MD. Protective factors, resiliency and healthy youth development. *Adolescent Medicine: State of the Art Reviews* 2000; **11**(1):157-164.
18. Lee TY, Cheung CK, Kwong WM. Resilience as a positive youth development construct: a conceptual review. *TheScientificWorldJournal* 2012; **2012**:390450.
19. Benard B. *Fostering Resiliency in Urban Schools. Closing the achievement gap: A vision for changing beliefs and practices.* Virginia: Association for Supervision and Curriculum Development 1996.
20. Benard B. *Protective factors in the family, school, and community.* Portland, OR: Western Center for Drug-Free Schools and Communities 1991
21. Bernat DH, Resnick MD. Healthy youth development: science and strategies. *Journal of Public Health Management & Practice* 2006; **Suppl**:S10-S16.
22. Toumbourou JW. *Drug Prevention Strategies: A Developmental Settings Approach Prevention Research Evaluation Report Number 2.* 2002. Melbourne, Australian Drug Foundation.
23. MindMatters Evaluation Consortium. *Report of the MindMatters (National Mental Health in Schools Project) Evaluation Project, vols. 1-4.* 2000. Newcastle, Hunter Institute of Mental Health.
24. Bond L, Butler H, Thomas L et al. Social and school connectedness in early secondary school as predictors of late teenage substance use, mental health, and academic outcomes. *J Adolesc Health* 2007; **40**(4):357.e9-357.e18.
25. Carvajal SC, Granillo TM. A prospective test of distal and proximal determinants of smoking initiation in early adolescents. *Addict Behav* 2006; **31**(4):649-660.
26. Fang L, Barnes-Ceeney K, Schinke SP. Substance use behavior among early-adolescent Asian American girls: the impact of psychological and family factors. *Women & Health* 2011; **51**(7):623-642.
27. Haegerich TM, Tolan PH. Core competencies and the prevention of adolescent substance use. *New Directions for Child & Adolescent Development* 2008; **2008**(122):47-60.
28. Hiemstra M, Otten R, Engels RC. Smoking onset and the time-varying effects of self-efficacy, environmental smoking, and smoking-specific parenting by using discrete-time survival analysis. *Journal of Behavioral Medicine* 2012; **35**(2):240-251.
29. Kavas AB. Self-esteem and health-risk behaviors among Turkish late adolescents. *Adolescence* 2009; **44**(173):187-198.
30. McLellan L, Rissel C, Donnelly N et al. Health behaviour and the school environment in New South Wales, Australia. *Social Science & Medicine* 1999; **49**(5):611-619.
31. Neumark-Sztainer D, Story M, French SA et al. Psychosocial correlates of health compromising behaviors among adolescents. *Health Educ Res* 1997; **12**(1):37-52.

- 1
- 2
- 3 32. Patton GC, Bond L, Carlin JB et al. Promoting social inclusion in schools: a group-randomized
- 4 trial of effects on student health risk behavior and well-being. *Am J Public Health* 2006;
- 5 **96**(9):1582-1587.
- 6
- 7 33. Piko BF, Kovacs E. Do parents and school matter? Protective factors for adolescent substance
- 8 use. *Addict Behav* 2010; **35**(1):53-56.
- 9
- 10 34. Vuille JC, Schenkel M. Social equalization in the health of youth. The role of the school.
- 11 *European Journal of Public Health* 2001; **11**(3):287-293.
- 12
- 13 35. Wiefferink CH, Peters L, Hoekstra F et al. Clustering of health-related behaviors and their
- 14 determinants: possible consequences for school health interventions. *Prevention Science* 2006;
- 15 **7**(2):127-149.
- 16
- 17 36. Wright LL, Palfai TP. Life goal appraisal and marijuana use among college students. *Addict*
- 18 *Behav* 2012; **37**(7):797-802.
- 19
- 20 37. Thomas R, Perera R. School-based programmes for preventing smoking. *Cochrane Database of*
- 21 *Systematic Reviews* 2006; **3**:CD001293.
- 22
- 23 38. Higgins JPT, Green S. *Cochrane Handbook for Systematic Reviews of Interventions*. Version
- 24 5.1.0 [updated March 2011]. Higgins JPT, Green S, editors. The Cochrane Collaboration, 2011.
- 25
- 26
- 27 39. Mercer SL, DeVinney BJ, Fine LJ et al. Study designs for effectiveness and translation research
- 28 :identifying trade-offs. *Am J Prev Med* 2007; **33**(2):139-154.
- 29
- 30 40. Medical Research Council. *Developing and evaluating complex interventions: new guidance*.
- 31 2008.
- 32
- 33 41. Battaglia MP, Link MW, Frankel MR et al. An evaluation of respondent selection methods of
- 34 respondent mail surveys. *Public Opinion Quarterly* 2008; **72**(3):459-469.
- 35
- 36 42. Oldendick RW, Bishop GF, Sorenson SB et al. A comparison of the Kish and last birthday
- 37 methods of respondent selection in telephone surveys. *Journal of Official Statistics* 1988;
- 38 **4**(4):307-318.
- 39
- 40 43. Nutbeam D, Bauman A. *Evaluation in a Nutshell: A practice guide to the evaluation of health*
- 41 *promotion programs*. North Ryde, Australia: McGraw-Hill 2006
- 42
- 43 44. Sadish W, Cook T, Campbell D. *Experimental and quasi-experimental designs for generalized*
- 44 *causal inference*. New York: Houghton Mifflin Company 2002
- 45
- 46 45. Craig P, Dieppe P, Macintyre S et al. *Developing and evaluating complex interventions: new*
- 47 *guidance*. 2008. Medical Research Council.
- 48
- 49 46. Armstrong R, Waters E, Jackson N et al. *Guidelines for systematic reviews of health promotion*
- 50 *and public health interventions*. [Version 2]. 2007. Australia, Melbourne University.
- 51
- 52 47. *Measuring protective factors and resilience traits in youth: The healthy kids resilience*
- 53 *assessment*. Seventh Annual Meeting of the Society for Prevention Research; California: School
- 54 *and Community Health Research Group*; 1999.
- 55
- 56 48. Hanson TL, Kim JO. *Measuring resilience and youth development: the psychometric properties*
- 57 *of the Healthy Kids Survey*. 2007. Washington, DC, U.S. Department of Education, Institute of
- 58
- 59
- 60

1  
2  
3 Education Sciences, National Centre for Education Evaluation and Regional Assistance,  
4 Regional Educational Laboratory West.

- 5  
6 49. Masten AS. Resilience in developing systems: Progress and promise as the fourth wave rises.  
7 Development and Psychopathology 2007;(3):921-930.  
8  
9 50. Brownlee K, Rawana J, Franks J et al. A systematic review of strengths and resilience outcome  
10 literature relevant to children and adolescents. Child & Adolescent Social Work Journal  
11 2013;No.  
12  
13 51. Griffin KW, Botvin GJ. Evidence-based interventions for preventing substance use disorders in  
14 adolescents. Child & Adolescent Psychiatric Clinics of North America 2010; 19(3):505-526.  
15  
16 52. Hawkins JD, Catalano RF, Miller JY. Risk and protective factors for alcohol and other drug  
17 problems in adolescence and early adulthood: implications for substance abuse prevention.  
18 Psychol Bull 1992; 112(1):64-105.  
19  
20 53. Petraitis J, Flay BR, Miller TQ. Reviewing theories of adolescent substance use: organizing  
21 pieces in the puzzle. Psychol Bull 1995; 117(1):67-86.  
22  
23 54. Kingsland M, Wiggers J, Wolfenden L. Interventions in sports settings to reduce alcohol  
24 consumption and alcohol-related harm: a systematic review. BMJ Open 2[2], 1-6. 6-4-2012.  
25 United Kingdom, BMJ Group.  
26  
27  
28  
29  
30  
31  
32  
33  
34  
35  
36  
37  
38  
39  
40  
41  
42  
43  
44  
45  
46  
47  
48  
49  
50  
51  
52  
53  
54  
55  
56  
57  
58  
59  
60

**APPENDIX 1**

Database: Ovid MEDLINE(R) 1946 to Present with Daily Update

Search Strategy:

1 (prevent\* or stop\* or quit\* or abstin\* or abstain\* or reduc\* or "tobacco use disorder" or ex-smoker or freedom from smoking or anti-smok\*).mp. [mp=title, abstract, original title, name of substance word, subject heading word, keyword heading word, protocol supplementary concept, rare disease supplementary concept, unique identifier] (2949486)

2 exp smoking/ or smoking.mp. or smoking cessation.mp. or exp smoking cessation/ or smok\*.mp. or noticine.mp. or tobacco.mp. or exp tobacco/ [mp=title, abstract, original title, name of substance word, subject heading word, keyword heading word, protocol supplementary concept, rare disease supplementary concept, unique identifier] (244905)

3 1 and 2 (75169)

4 exp alcohols/ad, ae (75999)

5 exp alcohol drinking/ (50226)

6 exp alcohol abuse/ (66163)

7 exp alcohol, ethyl/ae (7478)

8 exp alcohol abuse/mo, pc, rh, th (18949)

9 alcohol\*.ti,ab. (209848)

10 drink\*.ti,ab. (87398)

11 drunk\*.ti,ab. (3138)

12 intoxicat\*.ti,ab. (34927)

13 or/4-12 (382204)

14 cannabis.mp. or exp Cannabis/ (11714)

15 exp Marijuana Smoking/ (2487)

16 marijuana.mp. (11285)

17 street drugs.mp. or exp Street Drugs/ (9005)



- 1  
2  
3  
4  
5  
6  
7  
8  
9  
10  
11  
12  
13  
14  
15  
16  
17  
18  
19  
20  
21  
22  
23  
24  
25  
26  
27  
28  
29  
30  
31  
32  
33  
34  
35  
36  
37  
38  
39  
40  
41  
42  
43  
44  
45  
46  
47  
48  
49  
50  
51  
52  
53  
54  
55  
56  
57  
58  
59  
60
- 18 exp substance-related disorders/ (359827)
- 19 addict\*.ab,ti. (37697)
- 20 (abus\* or use\*).ab,ti. (4111763)
- 21 morphine.ab,ti. (38748)
- 22 hashish.mp. (457)
- 23 heroin.ab,ti. (9943)
- 24 "heroin dependence".mp. (7920)
- 25 exp \*n-methyl-3-4-methylenedioxyamphetamine/ or "ecstasy".mp. or "MDMA".mp. (4187)
- 26 exp \*hallucinogens/ or "hallucinogens".mp. (16151)
- 27 exp \*cocaine/ or exp \*crack cocaine/ or "cocaine".mp. (33227)
- 28 exp \*lysergic acid diethylamide/ or "lsd".mp. (4386)
- 29 or/14-28 (4402741)
- 30 risk-taking.mp. or exp Risk-Taking/ (23020)
- 31 risk behaviours.mp. (1383)
- 32 health risks.mp. (8865)
- 33 exp Health Behavior/ or health behaviours.mp. (94401)
- 34 or/30-33 (123513)
- 35 3 or 13 or 29 or 34 (4678307)
- 36 school.mp. or exp Schools/ (199868)
- 37 school health services.mp. or exp School Health Services/ (18410)
- 38 (school\* adj3 (intervention\* or program\* or course\* or polic\* or practice\* or curricul\* or  
49 environment\*)),mp. (15226)
- 52 39 or/36-38 (201010)
- 55 40 exp Child/ or child.mp. (1630031)
- 57 41 exp Adolescent/ or adolescent.mp. (1581151)

- 1  
2 42 (adolescen\* or student\* or class\*).mp. [mp=title, abstract, original title, name of substance word,  
3 subject heading word, keyword heading word, protocol supplementary concept, rare disease supplementary  
4 concept, unique identifier] (2503330)  
5  
6  
7 43 (teenage\* or youth).ti,ab. (43859)  
8  
9  
10 44 (early adj2 adult\*).ti,ab. (5053)  
11  
12 45 (young adj2 adult\*).ti,ab. (56450)  
13  
14 46 exp students/ (77794)  
15  
16 47 (young people or youth).mp. [mp=title, abstract, original title, name of substance word, subject heading  
17 word, keyword heading word, protocol supplementary concept, rare disease supplementary concept, unique  
18 identifier] (47625)  
19  
20  
21 48 or/40-47 (3361720)  
22  
23  
24 49 exp Resilience, Psychological/ (1218)  
25  
26 50 (resilience or resilienc\*).mp. [mp=title, abstract, original title, name of substance word, subject heading  
27 word, keyword heading word, protocol supplementary concept, rare disease supplementary concept, unique  
28 identifier] (7080)  
29  
30  
31 51 emotional intelligence.mp. or exp Emotional Intelligence/ (60696)  
32  
33  
34 52 mental health.mp. or exp Mental Health/ (104258)  
35  
36  
37 53 mental wellbeing.mp. (138)  
38  
39 54 communication/ or cooperative behavior/ or self efficacy/ or empathy/ or problem solving/ or self  
40 concept/ or goals/ or "aspirations (psychology)"/ or social environment/ (209017)  
41  
42  
43 55 Adolescent Development/ or youth development.mp. or Child Development/ (35780)  
44  
45 56 (school\* adj3 engage\*).mp. (316)  
46  
47 57 (school\* adj3 connect\*).mp. (330)  
48  
49  
50 58 (communit\* adj3 support\*).mp. (4200)  
51  
52 59 social participation/ or family/ or parent-child relations/ or family relations/ or peer group/ or social  
53 support/ or friends/ (144179)  
54  
55  
56 60 pro-social peers.mp. (2)  
57  
58 61 (positive adj3 (peer\* or friend\*)).mp. (486)  
59  
60

- 1  
2  
3  
4  
5  
6  
7  
8  
9  
10  
11  
12  
13  
14  
15  
16  
17  
18  
19  
20  
21  
22  
23  
24  
25  
26  
27  
28  
29  
30  
31  
32  
33  
34  
35  
36  
37  
38  
39  
40  
41  
42  
43  
44  
45  
46  
47  
48  
49  
50  
51  
52  
53  
54  
55  
56  
57  
58  
59  
60
- 62 life skill\*.mp. (593)
- 63 social environment.mp. or exp Social Environment/ (89397)
- 64 interpersonal relations.mp. or exp Interpersonal Relations/ (251156)
- 65 emotional wellbeing.mp. (202)
- 66 or/49-65 (661242)
- 67 randomized controlled trial.pt. (367158)
- 68 controlled clinical trial.pt. (87691)
- 69 (randomised or randomized).ab. (318587)
- 70 clinical trials as topic.sh. (169978)
- 71 randomly.ab. (187790)
- 72 trial.ti. (115019)
- 73 doubleblind.ab. (151)
- 74 singleblind.ab. (9)
- 75 experiment\*.mp. (1466450)
- 76 (pretest or pre test).mp. (9609)
- 77 (posttest or post test).mp. (9762)
- 78 (pre post or prepost).mp. (3758)
- 79 before after.mp. (2409)
- 80 (quasi-randomised or quasi-randomized or quazi-randomised or quazi-randomized).mp. (2369)
- 81 stepped wedge.mp. (67)
- 82 preference trial.mp. (41)
- 83 comprehensive cohort.mp. (49)
- 84 natural experiment.mp. (674)
- 85 (quasi experiment\* or quazi experiment\*).mp. [mp=title, abstract, original title, name of substance word, subject heading word, keyword heading word, protocol supplementary concept, rare disease supplementary concept, unique identifier] (4811)

- 1  
2 86 (randomised encouragement trial or randomized encouragement trial).mp. (3)  
3  
4 87 staggered enrolment trial of staggered enrollment trial.mp. (0)  
5  
6 88 (nonrandomised or non randomised or nonrandomized or non randomized).mp. (13227)  
7  
8  
9 89 interrupted time series.mp. (840)  
10  
11 90 (time series and trial).mp. (737)  
12  
13 91 multiple baseline.mp. (1262)  
14  
15 92 regression discontinuity.mp. (39)  
16  
17  
18 93 or/67-92 (2256891)  
19  
20 94 35 and 39 and 48 and 66 and 93 (1936)  
21  
22  
23  
24  
25  
26  
27  
28  
29  
30  
31  
32  
33  
34  
35  
36  
37  
38  
39  
40  
41  
42  
43  
44  
45  
46  
47  
48  
49  
50  
51  
52  
53  
54  
55  
56  
57  
58  
59  
60

**Resilience interventions for reducing adolescent tobacco, alcohol and illicit drug use**

**Date:** ..... **Reviewer:** .....

**Study Title:** .....

|                                |  |
|--------------------------------|--|
| <b>Trial ID:</b>               |  |
| <b>First Author:</b>           |  |
| <b>Year of Publication:</b>    |  |
| <b>Country of Publication:</b> |  |

**Study eligibility & inclusion criteria**

|                                                                                                                                                                                                                                                                                                                                                                                                                                                                                                                                                                                                                                                           | INCLUDE |    | EXCLUDE |  |
|-----------------------------------------------------------------------------------------------------------------------------------------------------------------------------------------------------------------------------------------------------------------------------------------------------------------------------------------------------------------------------------------------------------------------------------------------------------------------------------------------------------------------------------------------------------------------------------------------------------------------------------------------------------|---------|----|---------|--|
|                                                                                                                                                                                                                                                                                                                                                                                                                                                                                                                                                                                                                                                           | Yes     | No | Unclear |  |
| <p><b>Participants</b></p> <p>- Children aged 5 to 18 years</p>                                                                                                                                                                                                                                                                                                                                                                                                                                                                                                                                                                                           |         |    |         |  |
| <p><b>Outcome</b></p> <p>- tobacco use (including proportion ever smoked, frequency of smoking, number of cigarettes smoked, tobacco use in last week, current smoking status or established tobacco use)</p> <p>- alcohol consumption (including proportion ever consumed an alcoholic drink, alcohol use in last week, frequency of alcohol consumption, binge drinking or established alcohol use)</p> <p>- illicit drug use (including ever use or frequency of use of any illicit drug or a specific drug for example cannabis, amphetamines, or cocaine)</p>                                                                                        |         |    |         |  |
| <p><b>Comparator</b></p> <p>- no intervention, usual practice, attention only or an alternate intervention</p>                                                                                                                                                                                                                                                                                                                                                                                                                                                                                                                                            |         |    |         |  |
| <p><b>Study design</b></p> <p>- Randomised controlled trial, cluster randomised controlled trial;</p> <p>- Non-randomised trials (including staggered enrolment trials, stepped wedged trials; quasi-randomised trials where group allocation is not purely random; quasi experimental trials including, non-randomised pre-post, time series/interrupted time-series trials including multiple baseline trials with independent control groups, preference trials and regression discontinuity trials; natural experiment studies )</p>                                                                                                                  |         |    |         |  |
| <p><b>Intervention</b></p> <p>universal intervention targeting at least one internal and one external resilience factor</p> <p>- included internal resilience factors: cooperation and communication, self-efficacy, self-esteem, empathy, problem solving, decision-making skills, autonomy, self-awareness, goals and aspirations, social and emotional skills or competence, and self-control or self-regulation</p> <p>- included external resilience factors: meaningful participation, high adult expectations, caring relationships and support within home, school and community environments; peer caring relationships and pro-social peers</p> |         |    |         |  |

Include       Exclude       Obtain full text of article
